# Supplementary material for: Genomic Selection and Association Mapping in Rice (Oryza sativa): Effect of Trait Genetic Architecture, Training Population Composition, Marker Number and Statistical Model on Accuracy of Rice Genomic Selection in Elite, Tropical Rice Breeding Lines
Source: PLoS Genet. 2015 Feb 17;11(2):e1004982. doi: 10.1371/journal.pgen.1004982 (PMC4334555; doi:10.1371/journal.pgen.1004982)
Supplement: S5 Table — Distribution of SNPs was based on a bin parameter, i.e., the genome was divided into bins of a certain size, then ten subsets of SNPs were selected by choosing the SNPs in each bin with the largest minor allele frequencies and highest call rates. Training population = RYT 2009–2011 all. Cells in the SNP number column (within a particular trait and validation season) not connected by the same letter indicate a significant difference in the mean CV accuracy for this bin size for a given statistical method by pairwise student's t, α = 0.05 (each validation population and statistical method were run separately). Cells in the stat method column not connected by the same letter (within a particular trait and validation season) indicate a significant difference in the performance of this statistical method (versus the other four statistical methods) for a given bin size by pairwise student's t, α = 0.05 (each validation population and SNP number were run separately). All traits and validation seasons were also run separately. (XLSX) [file pgen.1004982.s010.xlsx]

## Sheet: Table_S5
Trait	Subset_type	VP	bin_size	SNP_num	stat_method	Selection	Accuracy
FL	distributed	2012 DS	25	ABC 13101	D BL	1	0.507725
FL	distributed	2012 DS	25	ABC 13101	D BL	2	0.496884
FL	distributed	2012 DS	25	ABC 13101	D BL	3	0.498711
FL	distributed	2012 DS	25	ABC 13101	D BL	4	0.487846
FL	distributed	2012 DS	25	ABC 13101	D BL	5	0.509264
FL	distributed	2012 DS	25	ABC 13101	D BL	6	0.501159
FL	distributed	2012 DS	25	ABC 13101	D BL	7	0.484479
FL	distributed	2012 DS	25	ABC 13101	D BL	8	0.484523
FL	distributed	2012 DS	25	ABC 13101	D BL	9	0.48289
FL	distributed	2012 DS	25	ABC 13101	D BL	10	0.500828
FL	distributed	2012 DS	50	A 7142	C BL	1	0.494913
FL	distributed	2012 DS	50	A 7142	C BL	2	0.510679
FL	distributed	2012 DS	50	A 7142	C BL	3	0.509004
FL	distributed	2012 DS	50	A 7142	C BL	4	0.457017
FL	distributed	2012 DS	50	A 7142	C BL	5	0.497077
FL	distributed	2012 DS	50	A 7142	C BL	6	0.505786
FL	distributed	2012 DS	50	A 7142	C BL	7	0.511626
FL	distributed	2012 DS	50	A 7142	C BL	8	0.507002
FL	distributed	2012 DS	50	A 7142	C BL	9	0.491209
FL	distributed	2012 DS	50	A 7142	C BL	10	0.548059
FL	distributed	2012 DS	120	AB 3076	B BL	1	0.485061
FL	distributed	2012 DS	120	AB 3076	B BL	2	0.540583
FL	distributed	2012 DS	120	AB 3076	B BL	3	0.467701
FL	distributed	2012 DS	120	AB 3076	B BL	4	0.485967
FL	distributed	2012 DS	120	AB 3076	B BL	5	0.491321
FL	distributed	2012 DS	120	AB 3076	B BL	6	0.492735
FL	distributed	2012 DS	120	AB 3076	B BL	7	0.48364
FL	distributed	2012 DS	120	AB 3076	B BL	8	0.490405
FL	distributed	2012 DS	120	AB 3076	B BL	9	0.531048
FL	distributed	2012 DS	120	AB 3076	B BL	10	0.514663
FL	distributed	2012 DS	240	ABCD 1553	C BL	1	0.472388
FL	distributed	2012 DS	240	ABCD 1553	C BL	2	0.511816
FL	distributed	2012 DS	240	ABCD 1553	C BL	3	0.552586
FL	distributed	2012 DS	240	ABCD 1553	C BL	4	0.441658
FL	distributed	2012 DS	240	ABCD 1553	C BL	5	0.500965
FL	distributed	2012 DS	240	ABCD 1553	C BL	6	0.46299
FL	distributed	2012 DS	240	ABCD 1553	C BL	7	0.448181
FL	distributed	2012 DS	240	ABCD 1553	C BL	8	0.50977
FL	distributed	2012 DS	240	ABCD 1553	C BL	9	0.461142
FL	distributed	2012 DS	240	ABCD 1553	C BL	10	0.480515
FL	distributed	2012 DS	480	ABCD 781	B BL	1	0.455167
FL	distributed	2012 DS	480	ABCD 781	B BL	2	0.473385
FL	distributed	2012 DS	480	ABCD 781	B BL	3	0.457937
FL	distributed	2012 DS	480	ABCD 781	B BL	4	0.457735
FL	distributed	2012 DS	480	ABCD 781	B BL	5	0.500119
FL	distributed	2012 DS	480	ABCD 781	B BL	6	0.531442
FL	distributed	2012 DS	480	ABCD 781	B BL	7	0.510004
FL	distributed	2012 DS	480	ABCD 781	B BL	8	0.488714
FL	distributed	2012 DS	480	ABCD 781	B BL	9	0.494756
FL	distributed	2012 DS	480	ABCD 781	B BL	10	0.473809
FL	distributed	2012 DS	840	BCDE 448	B BL	1	0.459724
FL	distributed	2012 DS	840	BCDE 448	B BL	2	0.454749
FL	distributed	2012 DS	840	BCDE 448	B BL	3	0.469185
FL	distributed	2012 DS	840	BCDE 448	B BL	4	0.43271
FL	distributed	2012 DS	840	BCDE 448	B BL	5	0.481047
FL	distributed	2012 DS	840	BCDE 448	B BL	6	0.466888
FL	distributed	2012 DS	840	BCDE 448	B BL	7	0.453164
FL	distributed	2012 DS	840	BCDE 448	B BL	8	0.529814
FL	distributed	2012 DS	840	BCDE 448	B BL	9	0.505048
FL	distributed	2012 DS	840	BCDE 448	B BL	10	0.473552
FL	distributed	2012 DS	1200	BCDE 316	B BL	1	0.523488
FL	distributed	2012 DS	1200	BCDE 316	B BL	2	0.511054
FL	distributed	2012 DS	1200	BCDE 316	B BL	3	0.551332
FL	distributed	2012 DS	1200	BCDE 316	B BL	4	0.467986
FL	distributed	2012 DS	1200	BCDE 316	B BL	5	0.415761
FL	distributed	2012 DS	1200	BCDE 316	B BL	6	0.430336
FL	distributed	2012 DS	1200	BCDE 316	B BL	7	0.47926
FL	distributed	2012 DS	1200	BCDE 316	B BL	8	0.463838
FL	distributed	2012 DS	1200	BCDE 316	B BL	9	0.486835
FL	distributed	2012 DS	1200	BCDE 316	B BL	10	0.424777
FL	distributed	2012 DS	1800	F 212	C BL	1	0.473213
FL	distributed	2012 DS	1800	F 212	C BL	2	0.46836
FL	distributed	2012 DS	1800	F 212	C BL	3	0.483426
FL	distributed	2012 DS	1800	F 212	C BL	4	0.441238
FL	distributed	2012 DS	1800	F 212	C BL	5	0.42726
FL	distributed	2012 DS	1800	F 212	C BL	6	0.405192
FL	distributed	2012 DS	1800	F 212	C BL	7	0.468774
FL	distributed	2012 DS	1800	F 212	C BL	8	0.42003
FL	distributed	2012 DS	1800	F 212	C BL	9	0.448289
FL	distributed	2012 DS	1800	F 212	C BL	10	0.405963
FL	distributed	2012 DS	2400	EF 161	B BL	1	0.468187
FL	distributed	2012 DS	2400	EF 161	B BL	2	0.506351
FL	distributed	2012 DS	2400	EF 161	B BL	3	0.507428
FL	distributed	2012 DS	2400	EF 161	B BL	4	0.451535
FL	distributed	2012 DS	2400	EF 161	B BL	5	0.424906
FL	distributed	2012 DS	2400	EF 161	B BL	6	0.410408
FL	distributed	2012 DS	2400	EF 161	B BL	7	0.450585
FL	distributed	2012 DS	2400	EF 161	B BL	8	0.456057
FL	distributed	2012 DS	2400	EF 161	B BL	9	0.461913
FL	distributed	2012 DS	2400	EF 161	B BL	10	0.425575
FL	distributed	2012 DS	3600	DEF 109	B BL	1	0.518986
FL	distributed	2012 DS	3600	DEF 109	B BL	2	0.492974
FL	distributed	2012 DS	3600	DEF 109	B BL	3	0.498014
FL	distributed	2012 DS	3600	DEF 109	B BL	4	0.467714
FL	distributed	2012 DS	3600	DEF 109	B BL	5	0.471509
FL	distributed	2012 DS	3600	DEF 109	B BL	6	0.426686
FL	distributed	2012 DS	3600	DEF 109	B BL	7	0.45401
FL	distributed	2012 DS	3600	DEF 109	B BL	8	0.431613
FL	distributed	2012 DS	3600	DEF 109	B BL	9	0.437426
FL	distributed	2012 DS	3600	DEF 109	B BL	10	0.395639
FL	distributed	2012 DS	4800	CDEF 83	B BL	1	0.489055
FL	distributed	2012 DS	4800	CDEF 83	B BL	2	0.526698
FL	distributed	2012 DS	4800	CDEF 83	B BL	3	0.524089
FL	distributed	2012 DS	4800	CDEF 83	B BL	4	0.453667
FL	distributed	2012 DS	4800	CDEF 83	B BL	5	0.47384
FL	distributed	2012 DS	4800	CDEF 83	B BL	6	0.444777
FL	distributed	2012 DS	4800	CDEF 83	B BL	7	0.475835
FL	distributed	2012 DS	4800	CDEF 83	B BL	8	0.432913
FL	distributed	2012 DS	4800	CDEF 83	B BL	9	0.474314
FL	distributed	2012 DS	4800	CDEF 83	B BL	10	0.414525
FL	distributed	2012 DS	25	A 13101	A MLR	1	0.626234
FL	distributed	2012 DS	25	A 13101	A MLR	2	0.54886
FL	distributed	2012 DS	25	A 13101	A MLR	3	0.635111
FL	distributed	2012 DS	25	A 13101	A MLR	4	0.636283
FL	distributed	2012 DS	25	A 13101	A MLR	5	0.62146
FL	distributed	2012 DS	25	A 13101	A MLR	6	0.613277
FL	distributed	2012 DS	25	A 13101	A MLR	7	0.624291
FL	distributed	2012 DS	25	A 13101	A MLR	8	0.630157
FL	distributed	2012 DS	25	A 13101	A MLR	9	0.629389
FL	distributed	2012 DS	25	A 13101	A MLR	10	0.627773
FL	distributed	2012 DS	50	A 7142	A MLR	1	0.601595
FL	distributed	2012 DS	50	A 7142	A MLR	2	0.635286
FL	distributed	2012 DS	50	A 7142	A MLR	3	0.481542
FL	distributed	2012 DS	50	A 7142	A MLR	4	0.625117
FL	distributed	2012 DS	50	A 7142	A MLR	5	0.64562
FL	distributed	2012 DS	50	A 7142	A MLR	6	0.617001
FL	distributed	2012 DS	50	A 7142	A MLR	7	0.621057
FL	distributed	2012 DS	50	A 7142	A MLR	8	0.633109
FL	distributed	2012 DS	50	A 7142	A MLR	9	0.630679
FL	distributed	2012 DS	50	A 7142	A MLR	10	0.642813
FL	distributed	2012 DS	120	CDE 3076	A MLR	1	0.574718
FL	distributed	2012 DS	120	CDE 3076	A MLR	2	0.637315
FL	distributed	2012 DS	120	CDE 3076	A MLR	3	0.562399
FL	distributed	2012 DS	120	CDE 3076	A MLR	4	0.446035
FL	distributed	2012 DS	120	CDE 3076	A MLR	5	0.572753
FL	distributed	2012 DS	120	CDE 3076	A MLR	6	0.529899
FL	distributed	2012 DS	120	CDE 3076	A MLR	7	0.546013
FL	distributed	2012 DS	120	CDE 3076	A MLR	8	0.534965
FL	distributed	2012 DS	120	CDE 3076	A MLR	9	0.567867
FL	distributed	2012 DS	120	CDE 3076	A MLR	10	0.529844
FL	distributed	2012 DS	240	BC 1553	A MLR	1	0.565854
FL	distributed	2012 DS	240	BC 1553	A MLR	2	0.580782
FL	distributed	2012 DS	240	BC 1553	A MLR	3	0.653051
FL	distributed	2012 DS	240	BC 1553	A MLR	4	0.531723
FL	distributed	2012 DS	240	BC 1553	A MLR	5	0.55144
FL	distributed	2012 DS	240	BC 1553	A MLR	6	0.58503
FL	distributed	2012 DS	240	BC 1553	A MLR	7	0.537969
FL	distributed	2012 DS	240	BC 1553	A MLR	8	0.565817
FL	distributed	2012 DS	240	BC 1553	A MLR	9	0.554154
FL	distributed	2012 DS	240	BC 1553	A MLR	10	0.516731
FL	distributed	2012 DS	480	CDEF 781	A MLR	1	0.541444
FL	distributed	2012 DS	480	CDEF 781	A MLR	2	0.53807
FL	distributed	2012 DS	480	CDEF 781	A MLR	3	0.52399
FL	distributed	2012 DS	480	CDEF 781	A MLR	4	0.524712
FL	distributed	2012 DS	480	CDEF 781	A MLR	5	0.547419
FL	distributed	2012 DS	480	CDEF 781	A MLR	6	0.561083
FL	distributed	2012 DS	480	CDEF 781	A MLR	7	0.559902
FL	distributed	2012 DS	480	CDEF 781	A MLR	8	0.543781
FL	distributed	2012 DS	480	CDEF 781	A MLR	9	0.542994
FL	distributed	2012 DS	480	CDEF 781	A MLR	10	0.534707
FL	distributed	2012 DS	840	EF 448	A MLR	1	0.544063
FL	distributed	2012 DS	840	EF 448	A MLR	2	0.534637
FL	distributed	2012 DS	840	EF 448	A MLR	3	0.53421
FL	distributed	2012 DS	840	EF 448	A MLR	4	0.530447
FL	distributed	2012 DS	840	EF 448	A MLR	5	0.523036
FL	distributed	2012 DS	840	EF 448	A MLR	6	0.560831
FL	distributed	2012 DS	840	EF 448	A MLR	7	0.528123
FL	distributed	2012 DS	840	EF 448	A MLR	8	0.574827
FL	distributed	2012 DS	840	EF 448	A MLR	9	0.396045
FL	distributed	2012 DS	840	EF 448	A MLR	10	0.505374
FL	distributed	2012 DS	1200	BCD 316	A MLR	1	0.536747
FL	distributed	2012 DS	1200	BCD 316	A MLR	2	0.572288
FL	distributed	2012 DS	1200	BCD 316	A MLR	3	0.610399
FL	distributed	2012 DS	1200	BCD 316	A MLR	4	0.582914
FL	distributed	2012 DS	1200	BCD 316	A MLR	5	0.551772
FL	distributed	2012 DS	1200	BCD 316	A MLR	6	0.522241
FL	distributed	2012 DS	1200	BCD 316	A MLR	7	0.54216
FL	distributed	2012 DS	1200	BCD 316	A MLR	8	0.554445
FL	distributed	2012 DS	1200	BCD 316	A MLR	9	0.544451
FL	distributed	2012 DS	1200	BCD 316	A MLR	10	0.514936
FL	distributed	2012 DS	1800	F 212	A MLR	1	0.530819
FL	distributed	2012 DS	1800	F 212	A MLR	2	0.542904
FL	distributed	2012 DS	1800	F 212	A MLR	3	0.533066
FL	distributed	2012 DS	1800	F 212	A MLR	4	0.538682
FL	distributed	2012 DS	1800	F 212	A MLR	5	0.510674
FL	distributed	2012 DS	1800	F 212	A MLR	6	0.481772
FL	distributed	2012 DS	1800	F 212	A MLR	7	0.531076
FL	distributed	2012 DS	1800	F 212	A MLR	8	0.512567
FL	distributed	2012 DS	1800	F 212	A MLR	9	0.540247
FL	distributed	2012 DS	1800	F 212	A MLR	10	0.490908
FL	distributed	2012 DS	2400	F 161	A MLR	1	0.534603
FL	distributed	2012 DS	2400	F 161	A MLR	2	0.533027
FL	distributed	2012 DS	2400	F 161	A MLR	3	0.533797
FL	distributed	2012 DS	2400	F 161	A MLR	4	0.516912
FL	distributed	2012 DS	2400	F 161	A MLR	5	0.513167
FL	distributed	2012 DS	2400	F 161	A MLR	6	0.507297
FL	distributed	2012 DS	2400	F 161	A MLR	7	0.536622
FL	distributed	2012 DS	2400	F 161	A MLR	8	0.504788
FL	distributed	2012 DS	2400	F 161	A MLR	9	0.537037
FL	distributed	2012 DS	2400	F 161	A MLR	10	0.493369
FL	distributed	2012 DS	3600	DEF 109	A MLR	1	0.545126
FL	distributed	2012 DS	3600	DEF 109	A MLR	2	0.543986
FL	distributed	2012 DS	3600	DEF 109	A MLR	3	0.526291
FL	distributed	2012 DS	3600	DEF 109	A MLR	4	0.527493
FL	distributed	2012 DS	3600	DEF 109	A MLR	5	0.49886
FL	distributed	2012 DS	3600	DEF 109	A MLR	6	0.514062
FL	distributed	2012 DS	3600	DEF 109	A MLR	7	0.540543
FL	distributed	2012 DS	3600	DEF 109	A MLR	8	0.530886
FL	distributed	2012 DS	3600	DEF 109	A MLR	9	0.552121
FL	distributed	2012 DS	3600	DEF 109	A MLR	10	0.485869
FL	distributed	2012 DS	4800	DEF 83	A MLR	1	0.545022
FL	distributed	2012 DS	4800	DEF 83	A MLR	2	0.548843
FL	distributed	2012 DS	4800	DEF 83	A MLR	3	0.557407
FL	distributed	2012 DS	4800	DEF 83	A MLR	4	0.529795
FL	distributed	2012 DS	4800	DEF 83	A MLR	5	0.534502
FL	distributed	2012 DS	4800	DEF 83	A MLR	6	0.517666
FL	distributed	2012 DS	4800	DEF 83	A MLR	7	0.520623
FL	distributed	2012 DS	4800	DEF 83	A MLR	8	0.510339
FL	distributed	2012 DS	4800	DEF 83	A MLR	9	0.550911
FL	distributed	2012 DS	4800	DEF 83	A MLR	10	0.505044
FL	distributed	2012 DS	25	A 13101	B RF	1	0.594364
FL	distributed	2012 DS	25	A 13101	B RF	2	0.589802
FL	distributed	2012 DS	25	A 13101	B RF	3	0.585166
FL	distributed	2012 DS	25	A 13101	B RF	4	0.589897
FL	distributed	2012 DS	25	A 13101	B RF	5	0.585512
FL	distributed	2012 DS	25	A 13101	B RF	6	0.601302
FL	distributed	2012 DS	25	A 13101	B RF	7	0.592685
FL	distributed	2012 DS	25	A 13101	B RF	8	0.587703
FL	distributed	2012 DS	25	A 13101	B RF	9	0.593112
FL	distributed	2012 DS	25	A 13101	B RF	10	0.593988
FL	distributed	2012 DS	50	A 7142	B RF	1	0.594267
FL	distributed	2012 DS	50	A 7142	B RF	2	0.590916
FL	distributed	2012 DS	50	A 7142	B RF	3	0.584443
FL	distributed	2012 DS	50	A 7142	B RF	4	0.577097
FL	distributed	2012 DS	50	A 7142	B RF	5	0.596755
FL	distributed	2012 DS	50	A 7142	B RF	6	0.575498
FL	distributed	2012 DS	50	A 7142	B RF	7	0.570991
FL	distributed	2012 DS	50	A 7142	B RF	8	0.567329
FL	distributed	2012 DS	50	A 7142	B RF	9	0.581077
FL	distributed	2012 DS	50	A 7142	B RF	10	0.573262
FL	distributed	2012 DS	120	BC 3076	A RF	1	0.568113
FL	distributed	2012 DS	120	BC 3076	A RF	2	0.593613
FL	distributed	2012 DS	120	BC 3076	A RF	3	0.527016
FL	distributed	2012 DS	120	BC 3076	A RF	4	0.521289
FL	distributed	2012 DS	120	BC 3076	A RF	5	0.539237
FL	distributed	2012 DS	120	BC 3076	A RF	6	0.522816
FL	distributed	2012 DS	120	BC 3076	A RF	7	0.564828
FL	distributed	2012 DS	120	BC 3076	A RF	8	0.525152
FL	distributed	2012 DS	120	BC 3076	A RF	9	0.538622
FL	distributed	2012 DS	120	BC 3076	A RF	10	0.539441
FL	distributed	2012 DS	240	CD 1553	B RF	1	0.557648
FL	distributed	2012 DS	240	CD 1553	B RF	2	0.544265
FL	distributed	2012 DS	240	CD 1553	B RF	3	0.589813
FL	distributed	2012 DS	240	CD 1553	B RF	4	0.532879
FL	distributed	2012 DS	240	CD 1553	B RF	5	0.51682
FL	distributed	2012 DS	240	CD 1553	B RF	6	0.537519
FL	distributed	2012 DS	240	CD 1553	B RF	7	0.523246
FL	distributed	2012 DS	240	CD 1553	B RF	8	0.533947
FL	distributed	2012 DS	240	CD 1553	B RF	9	0.504836
FL	distributed	2012 DS	240	CD 1553	B RF	10	0.511671
FL	distributed	2012 DS	480	CD 781	A RF	1	0.51925
FL	distributed	2012 DS	480	CD 781	A RF	2	0.514846
FL	distributed	2012 DS	480	CD 781	A RF	3	0.534738
FL	distributed	2012 DS	480	CD 781	A RF	4	0.513945
FL	distributed	2012 DS	480	CD 781	A RF	5	0.533706
FL	distributed	2012 DS	480	CD 781	A RF	6	0.546316
FL	distributed	2012 DS	480	CD 781	A RF	7	0.536488
FL	distributed	2012 DS	480	CD 781	A RF	8	0.509809
FL	distributed	2012 DS	480	CD 781	A RF	9	0.540573
FL	distributed	2012 DS	480	CD 781	A RF	10	0.512265
FL	distributed	2012 DS	840	DE 448	A RF	1	0.52353
FL	distributed	2012 DS	840	DE 448	A RF	2	0.523489
FL	distributed	2012 DS	840	DE 448	A RF	3	0.52808
FL	distributed	2012 DS	840	DE 448	A RF	4	0.517313
FL	distributed	2012 DS	840	DE 448	A RF	5	0.495233
FL	distributed	2012 DS	840	DE 448	A RF	6	0.508702
FL	distributed	2012 DS	840	DE 448	A RF	7	0.49589
FL	distributed	2012 DS	840	DE 448	A RF	8	0.556497
FL	distributed	2012 DS	840	DE 448	A RF	9	0.515254
FL	distributed	2012 DS	840	DE 448	A RF	10	0.48068
FL	distributed	2012 DS	1200	CDE 316	A RF	1	0.560181
FL	distributed	2012 DS	1200	CDE 316	A RF	2	0.566216
FL	distributed	2012 DS	1200	CDE 316	A RF	3	0.610013
FL	distributed	2012 DS	1200	CDE 316	A RF	4	0.537571
FL	distributed	2012 DS	1200	CDE 316	A RF	5	0.475276
FL	distributed	2012 DS	1200	CDE 316	A RF	6	0.492115
FL	distributed	2012 DS	1200	CDE 316	A RF	7	0.47972
FL	distributed	2012 DS	1200	CDE 316	A RF	8	0.502196
FL	distributed	2012 DS	1200	CDE 316	A RF	9	0.51257
FL	distributed	2012 DS	1200	CDE 316	A RF	10	0.480949
FL	distributed	2012 DS	1800	F 212	B RF	1	0.501797
FL	distributed	2012 DS	1800	F 212	B RF	2	0.507438
FL	distributed	2012 DS	1800	F 212	B RF	3	0.507871
FL	distributed	2012 DS	1800	F 212	B RF	4	0.497091
FL	distributed	2012 DS	1800	F 212	B RF	5	0.481406
FL	distributed	2012 DS	1800	F 212	B RF	6	0.483457
FL	distributed	2012 DS	1800	F 212	B RF	7	0.499589
FL	distributed	2012 DS	1800	F 212	B RF	8	0.48124
FL	distributed	2012 DS	1800	F 212	B RF	9	0.486296
FL	distributed	2012 DS	1800	F 212	B RF	10	0.457378
FL	distributed	2012 DS	2400	F 161	B RF	1	0.505098
FL	distributed	2012 DS	2400	F 161	B RF	2	0.53367
FL	distributed	2012 DS	2400	F 161	B RF	3	0.522461
FL	distributed	2012 DS	2400	F 161	B RF	4	0.495746
FL	distributed	2012 DS	2400	F 161	B RF	5	0.446619
FL	distributed	2012 DS	2400	F 161	B RF	6	0.451076
FL	distributed	2012 DS	2400	F 161	B RF	7	0.486038
FL	distributed	2012 DS	2400	F 161	B RF	8	0.467073
FL	distributed	2012 DS	2400	F 161	B RF	9	0.492155
FL	distributed	2012 DS	2400	F 161	B RF	10	0.443278
FL	distributed	2012 DS	3600	F 109	AB RF	1	0.52736
FL	distributed	2012 DS	3600	F 109	AB RF	2	0.507502
FL	distributed	2012 DS	3600	F 109	AB RF	3	0.507154
FL	distributed	2012 DS	3600	F 109	AB RF	4	0.505094
FL	distributed	2012 DS	3600	F 109	AB RF	5	0.475374
FL	distributed	2012 DS	3600	F 109	AB RF	6	0.451553
FL	distributed	2012 DS	3600	F 109	AB RF	7	0.511531
FL	distributed	2012 DS	3600	F 109	AB RF	8	0.453869
FL	distributed	2012 DS	3600	F 109	AB RF	9	0.481593
FL	distributed	2012 DS	3600	F 109	AB RF	10	0.429886
FL	distributed	2012 DS	4800	EF 83	AB RF	1	0.51309
FL	distributed	2012 DS	4800	EF 83	AB RF	2	0.532061
FL	distributed	2012 DS	4800	EF 83	AB RF	3	0.5402
FL	distributed	2012 DS	4800	EF 83	AB RF	4	0.52782
FL	distributed	2012 DS	4800	EF 83	AB RF	5	0.502323
FL	distributed	2012 DS	4800	EF 83	AB RF	6	0.479999
FL	distributed	2012 DS	4800	EF 83	AB RF	7	0.509527
FL	distributed	2012 DS	4800	EF 83	AB RF	8	0.438279
FL	distributed	2012 DS	4800	EF 83	AB RF	9	0.525033
FL	distributed	2012 DS	4800	EF 83	AB RF	10	0.451014
FL	distributed	2012 DS	25	A 13101	D RKHS	1	0.497162
FL	distributed	2012 DS	25	A 13101	D RKHS	2	0.497628
FL	distributed	2012 DS	25	A 13101	D RKHS	3	0.503506
FL	distributed	2012 DS	25	A 13101	D RKHS	4	0.493057
FL	distributed	2012 DS	25	A 13101	D RKHS	5	0.502182
FL	distributed	2012 DS	25	A 13101	D RKHS	6	0.498165
FL	distributed	2012 DS	25	A 13101	D RKHS	7	0.494374
FL	distributed	2012 DS	25	A 13101	D RKHS	8	0.497897
FL	distributed	2012 DS	25	A 13101	D RKHS	9	0.497788
FL	distributed	2012 DS	25	A 13101	D RKHS	10	0.498528
FL	distributed	2012 DS	50	A 7142	C RKHS	1	0.495933
FL	distributed	2012 DS	50	A 7142	C RKHS	2	0.50354
FL	distributed	2012 DS	50	A 7142	C RKHS	3	0.500961
FL	distributed	2012 DS	50	A 7142	C RKHS	4	0.477555
FL	distributed	2012 DS	50	A 7142	C RKHS	5	0.486778
FL	distributed	2012 DS	50	A 7142	C RKHS	6	0.493887
FL	distributed	2012 DS	50	A 7142	C RKHS	7	0.488572
FL	distributed	2012 DS	50	A 7142	C RKHS	8	0.501861
FL	distributed	2012 DS	50	A 7142	C RKHS	9	0.495393
FL	distributed	2012 DS	50	A 7142	C RKHS	10	0.521973
FL	distributed	2012 DS	120	B 3076	C RKHS	1	0.464686
FL	distributed	2012 DS	120	B 3076	C RKHS	2	0.485959
FL	distributed	2012 DS	120	B 3076	C RKHS	3	0.459012
FL	distributed	2012 DS	120	B 3076	C RKHS	4	0.459176
FL	distributed	2012 DS	120	B 3076	C RKHS	5	0.460228
FL	distributed	2012 DS	120	B 3076	C RKHS	6	0.464643
FL	distributed	2012 DS	120	B 3076	C RKHS	7	0.447734
FL	distributed	2012 DS	120	B 3076	C RKHS	8	0.447383
FL	distributed	2012 DS	120	B 3076	C RKHS	9	0.488179
FL	distributed	2012 DS	120	B 3076	C RKHS	10	0.47704
FL	distributed	2012 DS	240	C 1553	D RKHS	1	0.432401
FL	distributed	2012 DS	240	C 1553	D RKHS	2	0.468248
FL	distributed	2012 DS	240	C 1553	D RKHS	3	0.452728
FL	distributed	2012 DS	240	C 1553	D RKHS	4	0.415207
FL	distributed	2012 DS	240	C 1553	D RKHS	5	0.457942
FL	distributed	2012 DS	240	C 1553	D RKHS	6	0.41167
FL	distributed	2012 DS	240	C 1553	D RKHS	7	0.410803
FL	distributed	2012 DS	240	C 1553	D RKHS	8	0.441422
FL	distributed	2012 DS	240	C 1553	D RKHS	9	0.410889
FL	distributed	2012 DS	240	C 1553	D RKHS	10	0.430107
FL	distributed	2012 DS	480	C 781	C RKHS	1	0.401557
FL	distributed	2012 DS	480	C 781	C RKHS	2	0.424346
FL	distributed	2012 DS	480	C 781	C RKHS	3	0.39947
FL	distributed	2012 DS	480	C 781	C RKHS	4	0.417917
FL	distributed	2012 DS	480	C 781	C RKHS	5	0.438633
FL	distributed	2012 DS	480	C 781	C RKHS	6	0.466738
FL	distributed	2012 DS	480	C 781	C RKHS	7	0.43756
FL	distributed	2012 DS	480	C 781	C RKHS	8	0.433104
FL	distributed	2012 DS	480	C 781	C RKHS	9	0.427145
FL	distributed	2012 DS	480	C 781	C RKHS	10	0.44086
FL	distributed	2012 DS	840	CD 448	C RKHS	1	0.377914
FL	distributed	2012 DS	840	CD 448	C RKHS	2	0.396273
FL	distributed	2012 DS	840	CD 448	C RKHS	3	0.42213
FL	distributed	2012 DS	840	CD 448	C RKHS	4	0.382456
FL	distributed	2012 DS	840	CD 448	C RKHS	5	0.431504
FL	distributed	2012 DS	840	CD 448	C RKHS	6	0.403226
FL	distributed	2012 DS	840	CD 448	C RKHS	7	0.419734
FL	distributed	2012 DS	840	CD 448	C RKHS	8	0.477064
FL	distributed	2012 DS	840	CD 448	C RKHS	9	0.447413
FL	distributed	2012 DS	840	CD 448	C RKHS	10	0.428701
FL	distributed	2012 DS	1200	DE 316	C RKHS	1	0.414015
FL	distributed	2012 DS	1200	DE 316	C RKHS	2	0.441999
FL	distributed	2012 DS	1200	DE 316	C RKHS	3	0.43221
FL	distributed	2012 DS	1200	DE 316	C RKHS	4	0.370159
FL	distributed	2012 DS	1200	DE 316	C RKHS	5	0.304526
FL	distributed	2012 DS	1200	DE 316	C RKHS	6	0.376159
FL	distributed	2012 DS	1200	DE 316	C RKHS	7	0.432192
FL	distributed	2012 DS	1200	DE 316	C RKHS	8	0.400154
FL	distributed	2012 DS	1200	DE 316	C RKHS	9	0.390903
FL	distributed	2012 DS	1200	DE 316	C RKHS	10	0.383634
FL	distributed	2012 DS	1800	F 212	D RKHS	1	0.372779
FL	distributed	2012 DS	1800	F 212	D RKHS	2	0.365567
FL	distributed	2012 DS	1800	F 212	D RKHS	3	0.376615
FL	distributed	2012 DS	1800	F 212	D RKHS	4	0.346698
FL	distributed	2012 DS	1800	F 212	D RKHS	5	0.301993
FL	distributed	2012 DS	1800	F 212	D RKHS	6	0.287435
FL	distributed	2012 DS	1800	F 212	D RKHS	7	0.41287
FL	distributed	2012 DS	1800	F 212	D RKHS	8	0.303418
FL	distributed	2012 DS	1800	F 212	D RKHS	9	0.322993
FL	distributed	2012 DS	1800	F 212	D RKHS	10	0.306137
FL	distributed	2012 DS	2400	F 161	C RKHS	1	0.375355
FL	distributed	2012 DS	2400	F 161	C RKHS	2	0.384267
FL	distributed	2012 DS	2400	F 161	C RKHS	3	0.413578
FL	distributed	2012 DS	2400	F 161	C RKHS	4	0.37951
FL	distributed	2012 DS	2400	F 161	C RKHS	5	0.316934
FL	distributed	2012 DS	2400	F 161	C RKHS	6	0.283388
FL	distributed	2012 DS	2400	F 161	C RKHS	7	0.350359
FL	distributed	2012 DS	2400	F 161	C RKHS	8	0.388952
FL	distributed	2012 DS	2400	F 161	C RKHS	9	0.35996
FL	distributed	2012 DS	2400	F 161	C RKHS	10	0.346222
FL	distributed	2012 DS	3600	EF 109	C RKHS	1	0.463467
FL	distributed	2012 DS	3600	EF 109	C RKHS	2	0.38608
FL	distributed	2012 DS	3600	EF 109	C RKHS	3	0.420044
FL	distributed	2012 DS	3600	EF 109	C RKHS	4	0.405849
FL	distributed	2012 DS	3600	EF 109	C RKHS	5	0.417958
FL	distributed	2012 DS	3600	EF 109	C RKHS	6	0.311262
FL	distributed	2012 DS	3600	EF 109	C RKHS	7	0.359307
FL	distributed	2012 DS	3600	EF 109	C RKHS	8	0.372352
FL	distributed	2012 DS	3600	EF 109	C RKHS	9	0.267097
FL	distributed	2012 DS	3600	EF 109	C RKHS	10	0.288148
FL	distributed	2012 DS	4800	CD 83	C RKHS	1	0.432741
FL	distributed	2012 DS	4800	CD 83	C RKHS	2	0.458624
FL	distributed	2012 DS	4800	CD 83	C RKHS	3	0.463082
FL	distributed	2012 DS	4800	CD 83	C RKHS	4	0.412371
FL	distributed	2012 DS	4800	CD 83	C RKHS	5	0.429504
FL	distributed	2012 DS	4800	CD 83	C RKHS	6	0.355432
FL	distributed	2012 DS	4800	CD 83	C RKHS	7	0.431115
FL	distributed	2012 DS	4800	CD 83	C RKHS	8	0.371499
FL	distributed	2012 DS	4800	CD 83	C RKHS	9	0.414425
FL	distributed	2012 DS	4800	CD 83	C RKHS	10	0.338301
FL	distributed	2012 DS	25	A 13101	C rrBLUP	1	0.511093
FL	distributed	2012 DS	25	A 13101	C rrBLUP	2	0.509854
FL	distributed	2012 DS	25	A 13101	C rrBLUP	3	0.512951
FL	distributed	2012 DS	25	A 13101	C rrBLUP	4	0.506349
FL	distributed	2012 DS	25	A 13101	C rrBLUP	5	0.517166
FL	distributed	2012 DS	25	A 13101	C rrBLUP	6	0.512841
FL	distributed	2012 DS	25	A 13101	C rrBLUP	7	0.505935
FL	distributed	2012 DS	25	A 13101	C rrBLUP	8	0.512761
FL	distributed	2012 DS	25	A 13101	C rrBLUP	9	0.511822
FL	distributed	2012 DS	25	A 13101	C rrBLUP	10	0.514011
FL	distributed	2012 DS	50	A 7142	C rrBLUP	1	0.507882
FL	distributed	2012 DS	50	A 7142	C rrBLUP	2	0.518852
FL	distributed	2012 DS	50	A 7142	C rrBLUP	3	0.516722
FL	distributed	2012 DS	50	A 7142	C rrBLUP	4	0.492151
FL	distributed	2012 DS	50	A 7142	C rrBLUP	5	0.500953
FL	distributed	2012 DS	50	A 7142	C rrBLUP	6	0.510015
FL	distributed	2012 DS	50	A 7142	C rrBLUP	7	0.502304
FL	distributed	2012 DS	50	A 7142	C rrBLUP	8	0.5164
FL	distributed	2012 DS	50	A 7142	C rrBLUP	9	0.512048
FL	distributed	2012 DS	50	A 7142	C rrBLUP	10	0.534162
FL	distributed	2012 DS	120	A 3076	BC rrBLUP	1	0.477314
FL	distributed	2012 DS	120	A 3076	BC rrBLUP	2	0.505718
FL	distributed	2012 DS	120	A 3076	BC rrBLUP	3	0.478354
FL	distributed	2012 DS	120	A 3076	BC rrBLUP	4	0.472488
FL	distributed	2012 DS	120	A 3076	BC rrBLUP	5	0.471163
FL	distributed	2012 DS	120	A 3076	BC rrBLUP	6	0.475535
FL	distributed	2012 DS	120	A 3076	BC rrBLUP	7	0.469297
FL	distributed	2012 DS	120	A 3076	BC rrBLUP	8	0.464652
FL	distributed	2012 DS	120	A 3076	BC rrBLUP	9	0.50815
FL	distributed	2012 DS	120	A 3076	BC rrBLUP	10	0.505217
FL	distributed	2012 DS	240	B 1553	D rrBLUP	1	0.438095
FL	distributed	2012 DS	240	B 1553	D rrBLUP	2	0.480631
FL	distributed	2012 DS	240	B 1553	D rrBLUP	3	0.459333
FL	distributed	2012 DS	240	B 1553	D rrBLUP	4	0.428327
FL	distributed	2012 DS	240	B 1553	D rrBLUP	5	0.478726
FL	distributed	2012 DS	240	B 1553	D rrBLUP	6	0.428553
FL	distributed	2012 DS	240	B 1553	D rrBLUP	7	0.424943
FL	distributed	2012 DS	240	B 1553	D rrBLUP	8	0.463548
FL	distributed	2012 DS	240	B 1553	D rrBLUP	9	0.429
FL	distributed	2012 DS	240	B 1553	D rrBLUP	10	0.445392
FL	distributed	2012 DS	480	B 781	C rrBLUP	1	0.404617
FL	distributed	2012 DS	480	B 781	C rrBLUP	2	0.438016
FL	distributed	2012 DS	480	B 781	C rrBLUP	3	0.414894
FL	distributed	2012 DS	480	B 781	C rrBLUP	4	0.425875
FL	distributed	2012 DS	480	B 781	C rrBLUP	5	0.457027
FL	distributed	2012 DS	480	B 781	C rrBLUP	6	0.485894
FL	distributed	2012 DS	480	B 781	C rrBLUP	7	0.457904
FL	distributed	2012 DS	480	B 781	C rrBLUP	8	0.434651
FL	distributed	2012 DS	480	B 781	C rrBLUP	9	0.423654
FL	distributed	2012 DS	480	B 781	C rrBLUP	10	0.438018
FL	distributed	2012 DS	840	BC 448	C rrBLUP	1	0.399181
FL	distributed	2012 DS	840	BC 448	C rrBLUP	2	0.393933
FL	distributed	2012 DS	840	BC 448	C rrBLUP	3	0.415717
FL	distributed	2012 DS	840	BC 448	C rrBLUP	4	0.376811
FL	distributed	2012 DS	840	BC 448	C rrBLUP	5	0.433463
FL	distributed	2012 DS	840	BC 448	C rrBLUP	6	0.412009
FL	distributed	2012 DS	840	BC 448	C rrBLUP	7	0.434653
FL	distributed	2012 DS	840	BC 448	C rrBLUP	8	0.484888
FL	distributed	2012 DS	840	BC 448	C rrBLUP	9	0.44635
FL	distributed	2012 DS	840	BC 448	C rrBLUP	10	0.427976
FL	distributed	2012 DS	1200	C 316	C rrBLUP	1	0.432497
FL	distributed	2012 DS	1200	C 316	C rrBLUP	2	0.44448
FL	distributed	2012 DS	1200	C 316	C rrBLUP	3	0.42161
FL	distributed	2012 DS	1200	C 316	C rrBLUP	4	0.365509
FL	distributed	2012 DS	1200	C 316	C rrBLUP	5	0.309996
FL	distributed	2012 DS	1200	C 316	C rrBLUP	6	0.372503
FL	distributed	2012 DS	1200	C 316	C rrBLUP	7	0.435289
FL	distributed	2012 DS	1200	C 316	C rrBLUP	8	0.41126
FL	distributed	2012 DS	1200	C 316	C rrBLUP	9	0.411373
FL	distributed	2012 DS	1200	C 316	C rrBLUP	10	0.374757
FL	distributed	2012 DS	1800	D 212	D rrBLUP	1	0.371133
FL	distributed	2012 DS	1800	D 212	D rrBLUP	2	0.364706
FL	distributed	2012 DS	1800	D 212	D rrBLUP	3	0.372548
FL	distributed	2012 DS	1800	D 212	D rrBLUP	4	0.322091
FL	distributed	2012 DS	1800	D 212	D rrBLUP	5	0.290704
FL	distributed	2012 DS	1800	D 212	D rrBLUP	6	0.264875
FL	distributed	2012 DS	1800	D 212	D rrBLUP	7	0.411225
FL	distributed	2012 DS	1800	D 212	D rrBLUP	8	0.314733
FL	distributed	2012 DS	1800	D 212	D rrBLUP	9	0.352479
FL	distributed	2012 DS	1800	D 212	D rrBLUP	10	0.31406
FL	distributed	2012 DS	2400	D 161	C rrBLUP	1	0.379802
FL	distributed	2012 DS	2400	D 161	C rrBLUP	2	0.401432
FL	distributed	2012 DS	2400	D 161	C rrBLUP	3	0.412093
FL	distributed	2012 DS	2400	D 161	C rrBLUP	4	0.365639
FL	distributed	2012 DS	2400	D 161	C rrBLUP	5	0.31348
FL	distributed	2012 DS	2400	D 161	C rrBLUP	6	0.280909
FL	distributed	2012 DS	2400	D 161	C rrBLUP	7	0.338343
FL	distributed	2012 DS	2400	D 161	C rrBLUP	8	0.398045
FL	distributed	2012 DS	2400	D 161	C rrBLUP	9	0.368498
FL	distributed	2012 DS	2400	D 161	C rrBLUP	10	0.359615
FL	distributed	2012 DS	3600	D 109	C rrBLUP	1	0.475152
FL	distributed	2012 DS	3600	D 109	C rrBLUP	2	0.398229
FL	distributed	2012 DS	3600	D 109	C rrBLUP	3	0.419937
FL	distributed	2012 DS	3600	D 109	C rrBLUP	4	0.395748
FL	distributed	2012 DS	3600	D 109	C rrBLUP	5	0.407539
FL	distributed	2012 DS	3600	D 109	C rrBLUP	6	0.298472
FL	distributed	2012 DS	3600	D 109	C rrBLUP	7	0.319221
FL	distributed	2012 DS	3600	D 109	C rrBLUP	8	0.343379
FL	distributed	2012 DS	3600	D 109	C rrBLUP	9	0.288119
FL	distributed	2012 DS	3600	D 109	C rrBLUP	10	0.289273
FL	distributed	2012 DS	4800	C 83	C rrBLUP	1	0.439464
FL	distributed	2012 DS	4800	C 83	C rrBLUP	2	0.462595
FL	distributed	2012 DS	4800	C 83	C rrBLUP	3	0.455055
FL	distributed	2012 DS	4800	C 83	C rrBLUP	4	0.37119
FL	distributed	2012 DS	4800	C 83	C rrBLUP	5	0.400671
FL	distributed	2012 DS	4800	C 83	C rrBLUP	6	0.368732
FL	distributed	2012 DS	4800	C 83	C rrBLUP	7	0.391801
FL	distributed	2012 DS	4800	C 83	C rrBLUP	8	0.364825
FL	distributed	2012 DS	4800	C 83	C rrBLUP	9	0.377578
FL	distributed	2012 DS	4800	C 83	C rrBLUP	10	0.331458
FL	distributed	2012 WS	25	C 13101	D BL	1	0.321973
FL	distributed	2012 WS	25	C 13101	D BL	2	0.330352
FL	distributed	2012 WS	25	C 13101	D BL	3	0.383024
FL	distributed	2012 WS	25	C 13101	D BL	4	0.383978
FL	distributed	2012 WS	25	C 13101	D BL	5	0.33555
FL	distributed	2012 WS	25	C 13101	D BL	6	0.348806
FL	distributed	2012 WS	25	C 13101	D BL	7	0.387042
FL	distributed	2012 WS	25	C 13101	D BL	8	0.352057
FL	distributed	2012 WS	25	C 13101	D BL	9	0.332848
FL	distributed	2012 WS	25	C 13101	D BL	10	0.27779
FL	distributed	2012 WS	50	A 7142	C BL	1	0.380994
FL	distributed	2012 WS	50	A 7142	C BL	2	0.34702
FL	distributed	2012 WS	50	A 7142	C BL	3	0.382409
FL	distributed	2012 WS	50	A 7142	C BL	4	0.351711
FL	distributed	2012 WS	50	A 7142	C BL	5	0.37827
FL	distributed	2012 WS	50	A 7142	C BL	6	0.3609
FL	distributed	2012 WS	50	A 7142	C BL	7	0.385751
FL	distributed	2012 WS	50	A 7142	C BL	8	0.397675
FL	distributed	2012 WS	50	A 7142	C BL	9	0.36024
FL	distributed	2012 WS	50	A 7142	C BL	10	0.438188
FL	distributed	2012 WS	120	A 3076	B BL	1	0.365903
FL	distributed	2012 WS	120	A 3076	B BL	2	0.380651
FL	distributed	2012 WS	120	A 3076	B BL	3	0.353098
FL	distributed	2012 WS	120	A 3076	B BL	4	0.370233
FL	distributed	2012 WS	120	A 3076	B BL	5	0.368248
FL	distributed	2012 WS	120	A 3076	B BL	6	0.337382
FL	distributed	2012 WS	120	A 3076	B BL	7	0.411006
FL	distributed	2012 WS	120	A 3076	B BL	8	0.417386
FL	distributed	2012 WS	120	A 3076	B BL	9	0.383769
FL	distributed	2012 WS	120	A 3076	B BL	10	0.378431
FL	distributed	2012 WS	240	ABC 1553	B BL	1	0.355002
FL	distributed	2012 WS	240	ABC 1553	B BL	2	0.367746
FL	distributed	2012 WS	240	ABC 1553	B BL	3	0.38385
FL	distributed	2012 WS	240	ABC 1553	B BL	4	0.339775
FL	distributed	2012 WS	240	ABC 1553	B BL	5	0.38564
FL	distributed	2012 WS	240	ABC 1553	B BL	6	0.335871
FL	distributed	2012 WS	240	ABC 1553	B BL	7	0.337646
FL	distributed	2012 WS	240	ABC 1553	B BL	8	0.371819
FL	distributed	2012 WS	240	ABC 1553	B BL	9	0.355533
FL	distributed	2012 WS	240	ABC 1553	B BL	10	0.391523
FL	distributed	2012 WS	480	ABC 781	B BL	1	0.334858
FL	distributed	2012 WS	480	ABC 781	B BL	2	0.355142
FL	distributed	2012 WS	480	ABC 781	B BL	3	0.317082
FL	distributed	2012 WS	480	ABC 781	B BL	4	0.330211
FL	distributed	2012 WS	480	ABC 781	B BL	5	0.347882
FL	distributed	2012 WS	480	ABC 781	B BL	6	0.401021
FL	distributed	2012 WS	480	ABC 781	B BL	7	0.358147
FL	distributed	2012 WS	480	ABC 781	B BL	8	0.364463
FL	distributed	2012 WS	480	ABC 781	B BL	9	0.359545
FL	distributed	2012 WS	480	ABC 781	B BL	10	0.3501
FL	distributed	2012 WS	840	C 448	B BL	1	0.372696
FL	distributed	2012 WS	840	C 448	B BL	2	0.342094
FL	distributed	2012 WS	840	C 448	B BL	3	0.32814
FL	distributed	2012 WS	840	C 448	B BL	4	0.327644
FL	distributed	2012 WS	840	C 448	B BL	5	0.366162
FL	distributed	2012 WS	840	C 448	B BL	6	0.332421
FL	distributed	2012 WS	840	C 448	B BL	7	0.311811
FL	distributed	2012 WS	840	C 448	B BL	8	0.378508
FL	distributed	2012 WS	840	C 448	B BL	9	0.355191
FL	distributed	2012 WS	840	C 448	B BL	10	0.308239
FL	distributed	2012 WS	1200	ABC 316	B BL	1	0.4203
FL	distributed	2012 WS	1200	ABC 316	B BL	2	0.389914
FL	distributed	2012 WS	1200	ABC 316	B BL	3	0.428385
FL	distributed	2012 WS	1200	ABC 316	B BL	4	0.374406
FL	distributed	2012 WS	1200	ABC 316	B BL	5	0.345204
FL	distributed	2012 WS	1200	ABC 316	B BL	6	0.287668
FL	distributed	2012 WS	1200	ABC 316	B BL	7	0.372832
FL	distributed	2012 WS	1200	ABC 316	B BL	8	0.33228
FL	distributed	2012 WS	1200	ABC 316	B BL	9	0.34455
FL	distributed	2012 WS	1200	ABC 316	B BL	10	0.329295
FL	distributed	2012 WS	1800	BC 212	B BL	1	0.367787
FL	distributed	2012 WS	1800	BC 212	B BL	2	0.390818
FL	distributed	2012 WS	1800	BC 212	B BL	3	0.399636
FL	distributed	2012 WS	1800	BC 212	B BL	4	0.337094
FL	distributed	2012 WS	1800	BC 212	B BL	5	0.352664
FL	distributed	2012 WS	1800	BC 212	B BL	6	0.270455
FL	distributed	2012 WS	1800	BC 212	B BL	7	0.374867
FL	distributed	2012 WS	1800	BC 212	B BL	8	0.324031
FL	distributed	2012 WS	1800	BC 212	B BL	9	0.346645
FL	distributed	2012 WS	1800	BC 212	B BL	10	0.29577
FL	distributed	2012 WS	2400	ABC 161	B BL	1	0.367628
FL	distributed	2012 WS	2400	ABC 161	B BL	2	0.436287
FL	distributed	2012 WS	2400	ABC 161	B BL	3	0.400847
FL	distributed	2012 WS	2400	ABC 161	B BL	4	0.375516
FL	distributed	2012 WS	2400	ABC 161	B BL	5	0.370359
FL	distributed	2012 WS	2400	ABC 161	B BL	6	0.302973
FL	distributed	2012 WS	2400	ABC 161	B BL	7	0.351819
FL	distributed	2012 WS	2400	ABC 161	B BL	8	0.338865
FL	distributed	2012 WS	2400	ABC 161	B BL	9	0.359458
FL	distributed	2012 WS	2400	ABC 161	B BL	10	0.342517
FL	distributed	2012 WS	3600	ABC 109	B BL	1	0.424585
FL	distributed	2012 WS	3600	ABC 109	B BL	2	0.403882
FL	distributed	2012 WS	3600	ABC 109	B BL	3	0.403125
FL	distributed	2012 WS	3600	ABC 109	B BL	4	0.371505
FL	distributed	2012 WS	3600	ABC 109	B BL	5	0.377651
FL	distributed	2012 WS	3600	ABC 109	B BL	6	0.330327
FL	distributed	2012 WS	3600	ABC 109	B BL	7	0.361738
FL	distributed	2012 WS	3600	ABC 109	B BL	8	0.328157
FL	distributed	2012 WS	3600	ABC 109	B BL	9	0.348206
FL	distributed	2012 WS	3600	ABC 109	B BL	10	0.298767
FL	distributed	2012 WS	4800	AB 83	B BL	1	0.403927
FL	distributed	2012 WS	4800	AB 83	B BL	2	0.423177
FL	distributed	2012 WS	4800	AB 83	B BL	3	0.396232
FL	distributed	2012 WS	4800	AB 83	B BL	4	0.353139
FL	distributed	2012 WS	4800	AB 83	B BL	5	0.373828
FL	distributed	2012 WS	4800	AB 83	B BL	6	0.325837
FL	distributed	2012 WS	4800	AB 83	B BL	7	0.393093
FL	distributed	2012 WS	4800	AB 83	B BL	8	0.354853
FL	distributed	2012 WS	4800	AB 83	B BL	9	0.376603
FL	distributed	2012 WS	4800	AB 83	B BL	10	0.338253
FL	distributed	2012 WS	25	A 13101	A MLR	1	0.524408
FL	distributed	2012 WS	25	A 13101	A MLR	2	0.516483
FL	distributed	2012 WS	25	A 13101	A MLR	3	0.533881
FL	distributed	2012 WS	25	A 13101	A MLR	4	0.546911
FL	distributed	2012 WS	25	A 13101	A MLR	5	0.558478
FL	distributed	2012 WS	25	A 13101	A MLR	6	0.504411
FL	distributed	2012 WS	25	A 13101	A MLR	7	0.52821
FL	distributed	2012 WS	25	A 13101	A MLR	8	0.557887
FL	distributed	2012 WS	25	A 13101	A MLR	9	0.543427
FL	distributed	2012 WS	25	A 13101	A MLR	10	0.545534
FL	distributed	2012 WS	50	A 7142	A MLR	1	0.568613
FL	distributed	2012 WS	50	A 7142	A MLR	2	0.545424
FL	distributed	2012 WS	50	A 7142	A MLR	3	0.535901
FL	distributed	2012 WS	50	A 7142	A MLR	4	0.539426
FL	distributed	2012 WS	50	A 7142	A MLR	5	0.549499
FL	distributed	2012 WS	50	A 7142	A MLR	6	0.596112
FL	distributed	2012 WS	50	A 7142	A MLR	7	0.571164
FL	distributed	2012 WS	50	A 7142	A MLR	8	0.530865
FL	distributed	2012 WS	50	A 7142	A MLR	9	0.548344
FL	distributed	2012 WS	50	A 7142	A MLR	10	0.542729
FL	distributed	2012 WS	120	BC 3076	A MLR	1	0.469764
FL	distributed	2012 WS	120	BC 3076	A MLR	2	0.540374
FL	distributed	2012 WS	120	BC 3076	A MLR	3	0.472909
FL	distributed	2012 WS	120	BC 3076	A MLR	4	0.475313
FL	distributed	2012 WS	120	BC 3076	A MLR	5	0.441375
FL	distributed	2012 WS	120	BC 3076	A MLR	6	0.380743
FL	distributed	2012 WS	120	BC 3076	A MLR	7	0.543335
FL	distributed	2012 WS	120	BC 3076	A MLR	8	0.49146
FL	distributed	2012 WS	120	BC 3076	A MLR	9	0.467258
FL	distributed	2012 WS	120	BC 3076	A MLR	10	0.422101
FL	distributed	2012 WS	240	B 1553	A MLR	1	0.464603
FL	distributed	2012 WS	240	B 1553	A MLR	2	0.456775
FL	distributed	2012 WS	240	B 1553	A MLR	3	0.57659
FL	distributed	2012 WS	240	B 1553	A MLR	4	0.458774
FL	distributed	2012 WS	240	B 1553	A MLR	5	0.468385
FL	distributed	2012 WS	240	B 1553	A MLR	6	0.44663
FL	distributed	2012 WS	240	B 1553	A MLR	7	0.509544
FL	distributed	2012 WS	240	B 1553	A MLR	8	0.480186
FL	distributed	2012 WS	240	B 1553	A MLR	9	0.494402
FL	distributed	2012 WS	240	B 1553	A MLR	10	0.48665
FL	distributed	2012 WS	480	CD 781	A MLR	1	0.431242
FL	distributed	2012 WS	480	CD 781	A MLR	2	0.448982
FL	distributed	2012 WS	480	CD 781	A MLR	3	0.443274
FL	distributed	2012 WS	480	CD 781	A MLR	4	0.455662
FL	distributed	2012 WS	480	CD 781	A MLR	5	0.438478
FL	distributed	2012 WS	480	CD 781	A MLR	6	0.462846
FL	distributed	2012 WS	480	CD 781	A MLR	7	0.372814
FL	distributed	2012 WS	480	CD 781	A MLR	8	0.47383
FL	distributed	2012 WS	480	CD 781	A MLR	9	0.501436
FL	distributed	2012 WS	480	CD 781	A MLR	10	0.480295
FL	distributed	2012 WS	840	DE 448	A MLR	1	0.418013
FL	distributed	2012 WS	840	DE 448	A MLR	2	0.419428
FL	distributed	2012 WS	840	DE 448	A MLR	3	0.434801
FL	distributed	2012 WS	840	DE 448	A MLR	4	0.424184
FL	distributed	2012 WS	840	DE 448	A MLR	5	0.445795
FL	distributed	2012 WS	840	DE 448	A MLR	6	0.426777
FL	distributed	2012 WS	840	DE 448	A MLR	7	0.417412
FL	distributed	2012 WS	840	DE 448	A MLR	8	0.428489
FL	distributed	2012 WS	840	DE 448	A MLR	9	0.443201
FL	distributed	2012 WS	840	DE 448	A MLR	10	0.430453
FL	distributed	2012 WS	1200	DE 316	A MLR	1	0.483109
FL	distributed	2012 WS	1200	DE 316	A MLR	2	0.437996
FL	distributed	2012 WS	1200	DE 316	A MLR	3	0.489925
FL	distributed	2012 WS	1200	DE 316	A MLR	4	0.451816
FL	distributed	2012 WS	1200	DE 316	A MLR	5	0.439715
FL	distributed	2012 WS	1200	DE 316	A MLR	6	0.374342
FL	distributed	2012 WS	1200	DE 316	A MLR	7	0.45926
FL	distributed	2012 WS	1200	DE 316	A MLR	8	0.414897
FL	distributed	2012 WS	1200	DE 316	A MLR	9	0.435831
FL	distributed	2012 WS	1200	DE 316	A MLR	10	0.403514
FL	distributed	2012 WS	1800	E 212	A MLR	1	0.437265
FL	distributed	2012 WS	1800	E 212	A MLR	2	0.460935
FL	distributed	2012 WS	1800	E 212	A MLR	3	0.423474
FL	distributed	2012 WS	1800	E 212	A MLR	4	0.376761
FL	distributed	2012 WS	1800	E 212	A MLR	5	0.438293
FL	distributed	2012 WS	1800	E 212	A MLR	6	0.305952
FL	distributed	2012 WS	1800	E 212	A MLR	7	0.451539
FL	distributed	2012 WS	1800	E 212	A MLR	8	0.385121
FL	distributed	2012 WS	1800	E 212	A MLR	9	0.455649
FL	distributed	2012 WS	1800	E 212	A MLR	10	0.419881
FL	distributed	2012 WS	2400	DE 161	A MLR	1	0.447253
FL	distributed	2012 WS	2400	DE 161	A MLR	2	0.449209
FL	distributed	2012 WS	2400	DE 161	A MLR	3	0.43524
FL	distributed	2012 WS	2400	DE 161	A MLR	4	0.425195
FL	distributed	2012 WS	2400	DE 161	A MLR	5	0.435553
FL	distributed	2012 WS	2400	DE 161	A MLR	6	0.41935
FL	distributed	2012 WS	2400	DE 161	A MLR	7	0.460222
FL	distributed	2012 WS	2400	DE 161	A MLR	8	0.431468
FL	distributed	2012 WS	2400	DE 161	A MLR	9	0.438947
FL	distributed	2012 WS	2400	DE 161	A MLR	10	0.433985
FL	distributed	2012 WS	3600	CD 109	A MLR	1	0.447181
FL	distributed	2012 WS	3600	CD 109	A MLR	2	0.435221
FL	distributed	2012 WS	3600	CD 109	A MLR	3	0.45494
FL	distributed	2012 WS	3600	CD 109	A MLR	4	0.467543
FL	distributed	2012 WS	3600	CD 109	A MLR	5	0.447691
FL	distributed	2012 WS	3600	CD 109	A MLR	6	0.431777
FL	distributed	2012 WS	3600	CD 109	A MLR	7	0.454335
FL	distributed	2012 WS	3600	CD 109	A MLR	8	0.438306
FL	distributed	2012 WS	3600	CD 109	A MLR	9	0.446696
FL	distributed	2012 WS	3600	CD 109	A MLR	10	0.466572
FL	distributed	2012 WS	4800	D 83	A MLR	1	0.462518
FL	distributed	2012 WS	4800	D 83	A MLR	2	0.44454
FL	distributed	2012 WS	4800	D 83	A MLR	3	0.468789
FL	distributed	2012 WS	4800	D 83	A MLR	4	0.439806
FL	distributed	2012 WS	4800	D 83	A MLR	5	0.433483
FL	distributed	2012 WS	4800	D 83	A MLR	6	0.405927
FL	distributed	2012 WS	4800	D 83	A MLR	7	0.48753
FL	distributed	2012 WS	4800	D 83	A MLR	8	0.415049
FL	distributed	2012 WS	4800	D 83	A MLR	9	0.443839
FL	distributed	2012 WS	4800	D 83	A MLR	10	0.427402
FL	distributed	2012 WS	25	A 13101	B RF	1	0.416337
FL	distributed	2012 WS	25	A 13101	B RF	2	0.411535
FL	distributed	2012 WS	25	A 13101	B RF	3	0.415533
FL	distributed	2012 WS	25	A 13101	B RF	4	0.412739
FL	distributed	2012 WS	25	A 13101	B RF	5	0.407958
FL	distributed	2012 WS	25	A 13101	B RF	6	0.416397
FL	distributed	2012 WS	25	A 13101	B RF	7	0.414181
FL	distributed	2012 WS	25	A 13101	B RF	8	0.40922
FL	distributed	2012 WS	25	A 13101	B RF	9	0.420655
FL	distributed	2012 WS	25	A 13101	B RF	10	0.410078
FL	distributed	2012 WS	50	A 7142	B RF	1	0.429025
FL	distributed	2012 WS	50	A 7142	B RF	2	0.425441
FL	distributed	2012 WS	50	A 7142	B RF	3	0.423819
FL	distributed	2012 WS	50	A 7142	B RF	4	0.422376
FL	distributed	2012 WS	50	A 7142	B RF	5	0.42883
FL	distributed	2012 WS	50	A 7142	B RF	6	0.430106
FL	distributed	2012 WS	50	A 7142	B RF	7	0.423031
FL	distributed	2012 WS	50	A 7142	B RF	8	0.40462
FL	distributed	2012 WS	50	A 7142	B RF	9	0.414254
FL	distributed	2012 WS	50	A 7142	B RF	10	0.418161
FL	distributed	2012 WS	120	B 3076	B RF	1	0.412395
FL	distributed	2012 WS	120	B 3076	B RF	2	0.429048
FL	distributed	2012 WS	120	B 3076	B RF	3	0.378968
FL	distributed	2012 WS	120	B 3076	B RF	4	0.355145
FL	distributed	2012 WS	120	B 3076	B RF	5	0.381089
FL	distributed	2012 WS	120	B 3076	B RF	6	0.336424
FL	distributed	2012 WS	120	B 3076	B RF	7	0.398899
FL	distributed	2012 WS	120	B 3076	B RF	8	0.359055
FL	distributed	2012 WS	120	B 3076	B RF	9	0.386503
FL	distributed	2012 WS	120	B 3076	B RF	10	0.390692
FL	distributed	2012 WS	240	BC 1553	B RF	1	0.398235
FL	distributed	2012 WS	240	BC 1553	B RF	2	0.383944
FL	distributed	2012 WS	240	BC 1553	B RF	3	0.421882
FL	distributed	2012 WS	240	BC 1553	B RF	4	0.375349
FL	distributed	2012 WS	240	BC 1553	B RF	5	0.373137
FL	distributed	2012 WS	240	BC 1553	B RF	6	0.367101
FL	distributed	2012 WS	240	BC 1553	B RF	7	0.355091
FL	distributed	2012 WS	240	BC 1553	B RF	8	0.382326
FL	distributed	2012 WS	240	BC 1553	B RF	9	0.352336
FL	distributed	2012 WS	240	BC 1553	B RF	10	0.365226
FL	distributed	2012 WS	480	BCD 781	B RF	1	0.365198
FL	distributed	2012 WS	480	BCD 781	B RF	2	0.379383
FL	distributed	2012 WS	480	BCD 781	B RF	3	0.381634
FL	distributed	2012 WS	480	BCD 781	B RF	4	0.354853
FL	distributed	2012 WS	480	BCD 781	B RF	5	0.372604
FL	distributed	2012 WS	480	BCD 781	B RF	6	0.396381
FL	distributed	2012 WS	480	BCD 781	B RF	7	0.346291
FL	distributed	2012 WS	480	BCD 781	B RF	8	0.371849
FL	distributed	2012 WS	480	BCD 781	B RF	9	0.381421
FL	distributed	2012 WS	480	BCD 781	B RF	10	0.369513
FL	distributed	2012 WS	840	CD 448	B RF	1	0.378694
FL	distributed	2012 WS	840	CD 448	B RF	2	0.373505
FL	distributed	2012 WS	840	CD 448	B RF	3	0.3617
FL	distributed	2012 WS	840	CD 448	B RF	4	0.358749
FL	distributed	2012 WS	840	CD 448	B RF	5	0.344247
FL	distributed	2012 WS	840	CD 448	B RF	6	0.348534
FL	distributed	2012 WS	840	CD 448	B RF	7	0.34042
FL	distributed	2012 WS	840	CD 448	B RF	8	0.394204
FL	distributed	2012 WS	840	CD 448	B RF	9	0.351875
FL	distributed	2012 WS	840	CD 448	B RF	10	0.327934
FL	distributed	2012 WS	1200	BCD 316	B RF	1	0.417572
FL	distributed	2012 WS	1200	BCD 316	B RF	2	0.41312
FL	distributed	2012 WS	1200	BCD 316	B RF	3	0.4473
FL	distributed	2012 WS	1200	BCD 316	B RF	4	0.37748
FL	distributed	2012 WS	1200	BCD 316	B RF	5	0.345953
FL	distributed	2012 WS	1200	BCD 316	B RF	6	0.329676
FL	distributed	2012 WS	1200	BCD 316	B RF	7	0.348064
FL	distributed	2012 WS	1200	BCD 316	B RF	8	0.355159
FL	distributed	2012 WS	1200	BCD 316	B RF	9	0.3484
FL	distributed	2012 WS	1200	BCD 316	B RF	10	0.324503
FL	distributed	2012 WS	1800	D 212	B RF	1	0.353355
FL	distributed	2012 WS	1800	D 212	B RF	2	0.400686
FL	distributed	2012 WS	1800	D 212	B RF	3	0.360187
FL	distributed	2012 WS	1800	D 212	B RF	4	0.351517
FL	distributed	2012 WS	1800	D 212	B RF	5	0.346567
FL	distributed	2012 WS	1800	D 212	B RF	6	0.295404
FL	distributed	2012 WS	1800	D 212	B RF	7	0.360131
FL	distributed	2012 WS	1800	D 212	B RF	8	0.369215
FL	distributed	2012 WS	1800	D 212	B RF	9	0.35801
FL	distributed	2012 WS	1800	D 212	B RF	10	0.309808
FL	distributed	2012 WS	2400	BCD 161	B RF	1	0.393552
FL	distributed	2012 WS	2400	BCD 161	B RF	2	0.422981
FL	distributed	2012 WS	2400	BCD 161	B RF	3	0.383078
FL	distributed	2012 WS	2400	BCD 161	B RF	4	0.377356
FL	distributed	2012 WS	2400	BCD 161	B RF	5	0.320136
FL	distributed	2012 WS	2400	BCD 161	B RF	6	0.307198
FL	distributed	2012 WS	2400	BCD 161	B RF	7	0.371321
FL	distributed	2012 WS	2400	BCD 161	B RF	8	0.324303
FL	distributed	2012 WS	2400	BCD 161	B RF	9	0.356415
FL	distributed	2012 WS	2400	BCD 161	B RF	10	0.353631
FL	distributed	2012 WS	3600	CD 109	B RF	1	0.369153
FL	distributed	2012 WS	3600	CD 109	B RF	2	0.387675
FL	distributed	2012 WS	3600	CD 109	B RF	3	0.399461
FL	distributed	2012 WS	3600	CD 109	B RF	4	0.363657
FL	distributed	2012 WS	3600	CD 109	B RF	5	0.359748
FL	distributed	2012 WS	3600	CD 109	B RF	6	0.33206
FL	distributed	2012 WS	3600	CD 109	B RF	7	0.384453
FL	distributed	2012 WS	3600	CD 109	B RF	8	0.321827
FL	distributed	2012 WS	3600	CD 109	B RF	9	0.352588
FL	distributed	2012 WS	3600	CD 109	B RF	10	0.309806
FL	distributed	2012 WS	4800	BCD 83	B RF	1	0.373987
FL	distributed	2012 WS	4800	BCD 83	B RF	2	0.419709
FL	distributed	2012 WS	4800	BCD 83	B RF	3	0.389085
FL	distributed	2012 WS	4800	BCD 83	B RF	4	0.380986
FL	distributed	2012 WS	4800	BCD 83	B RF	5	0.366133
FL	distributed	2012 WS	4800	BCD 83	B RF	6	0.335982
FL	distributed	2012 WS	4800	BCD 83	B RF	7	0.388726
FL	distributed	2012 WS	4800	BCD 83	B RF	8	0.325538
FL	distributed	2012 WS	4800	BCD 83	B RF	9	0.367845
FL	distributed	2012 WS	4800	BCD 83	B RF	10	0.325134
FL	distributed	2012 WS	25	A 13101	C RKHS	1	0.377782
FL	distributed	2012 WS	25	A 13101	C RKHS	2	0.383985
FL	distributed	2012 WS	25	A 13101	C RKHS	3	0.391697
FL	distributed	2012 WS	25	A 13101	C RKHS	4	0.389803
FL	distributed	2012 WS	25	A 13101	C RKHS	5	0.387813
FL	distributed	2012 WS	25	A 13101	C RKHS	6	0.393474
FL	distributed	2012 WS	25	A 13101	C RKHS	7	0.386448
FL	distributed	2012 WS	25	A 13101	C RKHS	8	0.387209
FL	distributed	2012 WS	25	A 13101	C RKHS	9	0.382523
FL	distributed	2012 WS	25	A 13101	C RKHS	10	0.38241
FL	distributed	2012 WS	50	A 7142	C RKHS	1	0.379071
FL	distributed	2012 WS	50	A 7142	C RKHS	2	0.377794
FL	distributed	2012 WS	50	A 7142	C RKHS	3	0.381293
FL	distributed	2012 WS	50	A 7142	C RKHS	4	0.382612
FL	distributed	2012 WS	50	A 7142	C RKHS	5	0.385969
FL	distributed	2012 WS	50	A 7142	C RKHS	6	0.399018
FL	distributed	2012 WS	50	A 7142	C RKHS	7	0.396605
FL	distributed	2012 WS	50	A 7142	C RKHS	8	0.387611
FL	distributed	2012 WS	50	A 7142	C RKHS	9	0.392315
FL	distributed	2012 WS	50	A 7142	C RKHS	10	0.403884
FL	distributed	2012 WS	120	A 3076	B RKHS	1	0.363209
FL	distributed	2012 WS	120	A 3076	B RKHS	2	0.37298
FL	distributed	2012 WS	120	A 3076	B RKHS	3	0.342215
FL	distributed	2012 WS	120	A 3076	B RKHS	4	0.347087
FL	distributed	2012 WS	120	A 3076	B RKHS	5	0.350864
FL	distributed	2012 WS	120	A 3076	B RKHS	6	0.353627
FL	distributed	2012 WS	120	A 3076	B RKHS	7	0.362053
FL	distributed	2012 WS	120	A 3076	B RKHS	8	0.369821
FL	distributed	2012 WS	120	A 3076	B RKHS	9	0.398893
FL	distributed	2012 WS	120	A 3076	B RKHS	10	0.387074
FL	distributed	2012 WS	240	BC 1553	B RKHS	1	0.334865
FL	distributed	2012 WS	240	BC 1553	B RKHS	2	0.359928
FL	distributed	2012 WS	240	BC 1553	B RKHS	3	0.314575
FL	distributed	2012 WS	240	BC 1553	B RKHS	4	0.313485
FL	distributed	2012 WS	240	BC 1553	B RKHS	5	0.34334
FL	distributed	2012 WS	240	BC 1553	B RKHS	6	0.30426
FL	distributed	2012 WS	240	BC 1553	B RKHS	7	0.317227
FL	distributed	2012 WS	240	BC 1553	B RKHS	8	0.35883
FL	distributed	2012 WS	240	BC 1553	B RKHS	9	0.318521
FL	distributed	2012 WS	240	BC 1553	B RKHS	10	0.343606
FL	distributed	2012 WS	480	CDE 781	C RKHS	1	0.313942
FL	distributed	2012 WS	480	CDE 781	C RKHS	2	0.319342
FL	distributed	2012 WS	480	CDE 781	C RKHS	3	0.259359
FL	distributed	2012 WS	480	CDE 781	C RKHS	4	0.279832
FL	distributed	2012 WS	480	CDE 781	C RKHS	5	0.297839
FL	distributed	2012 WS	480	CDE 781	C RKHS	6	0.356948
FL	distributed	2012 WS	480	CDE 781	C RKHS	7	0.281852
FL	distributed	2012 WS	480	CDE 781	C RKHS	8	0.31758
FL	distributed	2012 WS	480	CDE 781	C RKHS	9	0.305175
FL	distributed	2012 WS	480	CDE 781	C RKHS	10	0.32885
FL	distributed	2012 WS	840	CDE 448	C RKHS	1	0.333654
FL	distributed	2012 WS	840	CDE 448	C RKHS	2	0.292473
FL	distributed	2012 WS	840	CDE 448	C RKHS	3	0.309395
FL	distributed	2012 WS	840	CDE 448	C RKHS	4	0.282335
FL	distributed	2012 WS	840	CDE 448	C RKHS	5	0.319241
FL	distributed	2012 WS	840	CDE 448	C RKHS	6	0.288514
FL	distributed	2012 WS	840	CDE 448	C RKHS	7	0.301215
FL	distributed	2012 WS	840	CDE 448	C RKHS	8	0.322961
FL	distributed	2012 WS	840	CDE 448	C RKHS	9	0.321633
FL	distributed	2012 WS	840	CDE 448	C RKHS	10	0.28098
FL	distributed	2012 WS	1200	CDE 316	C RKHS	1	0.364417
FL	distributed	2012 WS	1200	CDE 316	C RKHS	2	0.335573
FL	distributed	2012 WS	1200	CDE 316	C RKHS	3	0.330677
FL	distributed	2012 WS	1200	CDE 316	C RKHS	4	0.30904
FL	distributed	2012 WS	1200	CDE 316	C RKHS	5	0.284618
FL	distributed	2012 WS	1200	CDE 316	C RKHS	6	0.241891
FL	distributed	2012 WS	1200	CDE 316	C RKHS	7	0.339997
FL	distributed	2012 WS	1200	CDE 316	C RKHS	8	0.311402
FL	distributed	2012 WS	1200	CDE 316	C RKHS	9	0.25662
FL	distributed	2012 WS	1200	CDE 316	C RKHS	10	0.293274
FL	distributed	2012 WS	1800	F 212	C RKHS	1	0.282126
FL	distributed	2012 WS	1800	F 212	C RKHS	2	0.310859
FL	distributed	2012 WS	1800	F 212	C RKHS	3	0.322207
FL	distributed	2012 WS	1800	F 212	C RKHS	4	0.258226
FL	distributed	2012 WS	1800	F 212	C RKHS	5	0.255645
FL	distributed	2012 WS	1800	F 212	C RKHS	6	0.182326
FL	distributed	2012 WS	1800	F 212	C RKHS	7	0.326621
FL	distributed	2012 WS	1800	F 212	C RKHS	8	0.238819
FL	distributed	2012 WS	1800	F 212	C RKHS	9	0.240618
FL	distributed	2012 WS	1800	F 212	C RKHS	10	0.20751
FL	distributed	2012 WS	2400	DE 161	C RKHS	1	0.30286
FL	distributed	2012 WS	2400	DE 161	C RKHS	2	0.33835
FL	distributed	2012 WS	2400	DE 161	C RKHS	3	0.294504
FL	distributed	2012 WS	2400	DE 161	C RKHS	4	0.33757
FL	distributed	2012 WS	2400	DE 161	C RKHS	5	0.315569
FL	distributed	2012 WS	2400	DE 161	C RKHS	6	0.205714
FL	distributed	2012 WS	2400	DE 161	C RKHS	7	0.299963
FL	distributed	2012 WS	2400	DE 161	C RKHS	8	0.305116
FL	distributed	2012 WS	2400	DE 161	C RKHS	9	0.264171
FL	distributed	2012 WS	2400	DE 161	C RKHS	10	0.29691
FL	distributed	2012 WS	3600	EF 109	C RKHS	1	0.377312
FL	distributed	2012 WS	3600	EF 109	C RKHS	2	0.316068
FL	distributed	2012 WS	3600	EF 109	C RKHS	3	0.323513
FL	distributed	2012 WS	3600	EF 109	C RKHS	4	0.335768
FL	distributed	2012 WS	3600	EF 109	C RKHS	5	0.350365
FL	distributed	2012 WS	3600	EF 109	C RKHS	6	0.237525
FL	distributed	2012 WS	3600	EF 109	C RKHS	7	0.267664
FL	distributed	2012 WS	3600	EF 109	C RKHS	8	0.25262
FL	distributed	2012 WS	3600	EF 109	C RKHS	9	0.201611
FL	distributed	2012 WS	3600	EF 109	C RKHS	10	0.188845
FL	distributed	2012 WS	4800	BCD 83	C RKHS	1	0.341568
FL	distributed	2012 WS	4800	BCD 83	C RKHS	2	0.374744
FL	distributed	2012 WS	4800	BCD 83	C RKHS	3	0.318385
FL	distributed	2012 WS	4800	BCD 83	C RKHS	4	0.311834
FL	distributed	2012 WS	4800	BCD 83	C RKHS	5	0.337344
FL	distributed	2012 WS	4800	BCD 83	C RKHS	6	0.270806
FL	distributed	2012 WS	4800	BCD 83	C RKHS	7	0.351797
FL	distributed	2012 WS	4800	BCD 83	C RKHS	8	0.285455
FL	distributed	2012 WS	4800	BCD 83	C RKHS	9	0.334981
FL	distributed	2012 WS	4800	BCD 83	C RKHS	10	0.245187
FL	distributed	2012 WS	25	A 13101	C rrBLUP	1	0.38295
FL	distributed	2012 WS	25	A 13101	C rrBLUP	2	0.383797
FL	distributed	2012 WS	25	A 13101	C rrBLUP	3	0.387997
FL	distributed	2012 WS	25	A 13101	C rrBLUP	4	0.385428
FL	distributed	2012 WS	25	A 13101	C rrBLUP	5	0.38951
FL	distributed	2012 WS	25	A 13101	C rrBLUP	6	0.388979
FL	distributed	2012 WS	25	A 13101	C rrBLUP	7	0.383867
FL	distributed	2012 WS	25	A 13101	C rrBLUP	8	0.390071
FL	distributed	2012 WS	25	A 13101	C rrBLUP	9	0.386223
FL	distributed	2012 WS	25	A 13101	C rrBLUP	10	0.385733
FL	distributed	2012 WS	50	A 7142	C rrBLUP	1	0.383238
FL	distributed	2012 WS	50	A 7142	C rrBLUP	2	0.382027
FL	distributed	2012 WS	50	A 7142	C rrBLUP	3	0.388288
FL	distributed	2012 WS	50	A 7142	C rrBLUP	4	0.377741
FL	distributed	2012 WS	50	A 7142	C rrBLUP	5	0.377195
FL	distributed	2012 WS	50	A 7142	C rrBLUP	6	0.390894
FL	distributed	2012 WS	50	A 7142	C rrBLUP	7	0.389848
FL	distributed	2012 WS	50	A 7142	C rrBLUP	8	0.386575
FL	distributed	2012 WS	50	A 7142	C rrBLUP	9	0.393156
FL	distributed	2012 WS	50	A 7142	C rrBLUP	10	0.401021
FL	distributed	2012 WS	120	AB 3076	B rrBLUP	1	0.368119
FL	distributed	2012 WS	120	AB 3076	B rrBLUP	2	0.381739
FL	distributed	2012 WS	120	AB 3076	B rrBLUP	3	0.345387
FL	distributed	2012 WS	120	AB 3076	B rrBLUP	4	0.350358
FL	distributed	2012 WS	120	AB 3076	B rrBLUP	5	0.354749
FL	distributed	2012 WS	120	AB 3076	B rrBLUP	6	0.356201
FL	distributed	2012 WS	120	AB 3076	B rrBLUP	7	0.356444
FL	distributed	2012 WS	120	AB 3076	B rrBLUP	8	0.357529
FL	distributed	2012 WS	120	AB 3076	B rrBLUP	9	0.391435
FL	distributed	2012 WS	120	AB 3076	B rrBLUP	10	0.383532
FL	distributed	2012 WS	240	BC 1553	C rrBLUP	1	0.325055
FL	distributed	2012 WS	240	BC 1553	C rrBLUP	2	0.370897
FL	distributed	2012 WS	240	BC 1553	C rrBLUP	3	0.317358
FL	distributed	2012 WS	240	BC 1553	C rrBLUP	4	0.328956
FL	distributed	2012 WS	240	BC 1553	C rrBLUP	5	0.359418
FL	distributed	2012 WS	240	BC 1553	C rrBLUP	6	0.319814
FL	distributed	2012 WS	240	BC 1553	C rrBLUP	7	0.317927
FL	distributed	2012 WS	240	BC 1553	C rrBLUP	8	0.363632
FL	distributed	2012 WS	240	BC 1553	C rrBLUP	9	0.310857
FL	distributed	2012 WS	240	BC 1553	C rrBLUP	10	0.330017
FL	distributed	2012 WS	480	CD 781	C rrBLUP	1	0.305047
FL	distributed	2012 WS	480	CD 781	C rrBLUP	2	0.34259
FL	distributed	2012 WS	480	CD 781	C rrBLUP	3	0.274637
FL	distributed	2012 WS	480	CD 781	C rrBLUP	4	0.297103
FL	distributed	2012 WS	480	CD 781	C rrBLUP	5	0.311604
FL	distributed	2012 WS	480	CD 781	C rrBLUP	6	0.365817
FL	distributed	2012 WS	480	CD 781	C rrBLUP	7	0.313691
FL	distributed	2012 WS	480	CD 781	C rrBLUP	8	0.315089
FL	distributed	2012 WS	480	CD 781	C rrBLUP	9	0.308684
FL	distributed	2012 WS	480	CD 781	C rrBLUP	10	0.322362
FL	distributed	2012 WS	840	CD 448	C rrBLUP	1	0.328198
FL	distributed	2012 WS	840	CD 448	C rrBLUP	2	0.293263
FL	distributed	2012 WS	840	CD 448	C rrBLUP	3	0.299184
FL	distributed	2012 WS	840	CD 448	C rrBLUP	4	0.287275
FL	distributed	2012 WS	840	CD 448	C rrBLUP	5	0.321714
FL	distributed	2012 WS	840	CD 448	C rrBLUP	6	0.29619
FL	distributed	2012 WS	840	CD 448	C rrBLUP	7	0.309617
FL	distributed	2012 WS	840	CD 448	C rrBLUP	8	0.33183
FL	distributed	2012 WS	840	CD 448	C rrBLUP	9	0.317253
FL	distributed	2012 WS	840	CD 448	C rrBLUP	10	0.279516
FL	distributed	2012 WS	1200	ABC 316	C rrBLUP	1	0.36742
FL	distributed	2012 WS	1200	ABC 316	C rrBLUP	2	0.330641
FL	distributed	2012 WS	1200	ABC 316	C rrBLUP	3	0.329149
FL	distributed	2012 WS	1200	ABC 316	C rrBLUP	4	0.311145
FL	distributed	2012 WS	1200	ABC 316	C rrBLUP	5	0.277951
FL	distributed	2012 WS	1200	ABC 316	C rrBLUP	6	0.243654
FL	distributed	2012 WS	1200	ABC 316	C rrBLUP	7	0.335034
FL	distributed	2012 WS	1200	ABC 316	C rrBLUP	8	0.309746
FL	distributed	2012 WS	1200	ABC 316	C rrBLUP	9	0.274103
FL	distributed	2012 WS	1200	ABC 316	C rrBLUP	10	0.291064
FL	distributed	2012 WS	1800	BC 212	C rrBLUP	1	0.295058
FL	distributed	2012 WS	1800	BC 212	C rrBLUP	2	0.317115
FL	distributed	2012 WS	1800	BC 212	C rrBLUP	3	0.331162
FL	distributed	2012 WS	1800	BC 212	C rrBLUP	4	0.246478
FL	distributed	2012 WS	1800	BC 212	C rrBLUP	5	0.258335
FL	distributed	2012 WS	1800	BC 212	C rrBLUP	6	0.15979
FL	distributed	2012 WS	1800	BC 212	C rrBLUP	7	0.32356
FL	distributed	2012 WS	1800	BC 212	C rrBLUP	8	0.239011
FL	distributed	2012 WS	1800	BC 212	C rrBLUP	9	0.254394
FL	distributed	2012 WS	1800	BC 212	C rrBLUP	10	0.205383
FL	distributed	2012 WS	2400	ABC 161	C rrBLUP	1	0.303877
FL	distributed	2012 WS	2400	ABC 161	C rrBLUP	2	0.372773
FL	distributed	2012 WS	2400	ABC 161	C rrBLUP	3	0.33149
FL	distributed	2012 WS	2400	ABC 161	C rrBLUP	4	0.347572
FL	distributed	2012 WS	2400	ABC 161	C rrBLUP	5	0.302629
FL	distributed	2012 WS	2400	ABC 161	C rrBLUP	6	0.211163
FL	distributed	2012 WS	2400	ABC 161	C rrBLUP	7	0.275693
FL	distributed	2012 WS	2400	ABC 161	C rrBLUP	8	0.296384
FL	distributed	2012 WS	2400	ABC 161	C rrBLUP	9	0.290091
FL	distributed	2012 WS	2400	ABC 161	C rrBLUP	10	0.30675
FL	distributed	2012 WS	3600	ABC 109	C rrBLUP	1	0.394681
FL	distributed	2012 WS	3600	ABC 109	C rrBLUP	2	0.329602
FL	distributed	2012 WS	3600	ABC 109	C rrBLUP	3	0.350251
FL	distributed	2012 WS	3600	ABC 109	C rrBLUP	4	0.332953
FL	distributed	2012 WS	3600	ABC 109	C rrBLUP	5	0.32441
FL	distributed	2012 WS	3600	ABC 109	C rrBLUP	6	0.238043
FL	distributed	2012 WS	3600	ABC 109	C rrBLUP	7	0.241411
FL	distributed	2012 WS	3600	ABC 109	C rrBLUP	8	0.249227
FL	distributed	2012 WS	3600	ABC 109	C rrBLUP	9	0.224296
FL	distributed	2012 WS	3600	ABC 109	C rrBLUP	10	0.206827
FL	distributed	2012 WS	4800	AB 83	C rrBLUP	1	0.368273
FL	distributed	2012 WS	4800	AB 83	C rrBLUP	2	0.367115
FL	distributed	2012 WS	4800	AB 83	C rrBLUP	3	0.320946
FL	distributed	2012 WS	4800	AB 83	C rrBLUP	4	0.286764
FL	distributed	2012 WS	4800	AB 83	C rrBLUP	5	0.299229
FL	distributed	2012 WS	4800	AB 83	C rrBLUP	6	0.25217
FL	distributed	2012 WS	4800	AB 83	C rrBLUP	7	0.335298
FL	distributed	2012 WS	4800	AB 83	C rrBLUP	8	0.308388
FL	distributed	2012 WS	4800	AB 83	C rrBLUP	9	0.309332
FL	distributed	2012 WS	4800	AB 83	C rrBLUP	10	0.250109
GrnYld	distributed	2012 DS	25	13101	C BL	1	0.17879
GrnYld	distributed	2012 DS	25	13101	C BL	2	0.193732
GrnYld	distributed	2012 DS	25	13101	C BL	3	0.185731
GrnYld	distributed	2012 DS	25	13101	C BL	4	0.208685
GrnYld	distributed	2012 DS	25	13101	C BL	5	0.149906
GrnYld	distributed	2012 DS	25	13101	C BL	6	0.203369
GrnYld	distributed	2012 DS	25	13101	C BL	7	0.150438
GrnYld	distributed	2012 DS	25	13101	C BL	8	0.145001
GrnYld	distributed	2012 DS	25	13101	C BL	9	0.140327
GrnYld	distributed	2012 DS	25	13101	C BL	10	0.161006
GrnYld	distributed	2012 DS	50	7142	B BL	1	0.174602
GrnYld	distributed	2012 DS	50	7142	B BL	2	0.161539
GrnYld	distributed	2012 DS	50	7142	B BL	3	0.18531
GrnYld	distributed	2012 DS	50	7142	B BL	4	0.159792
GrnYld	distributed	2012 DS	50	7142	B BL	5	0.178715
GrnYld	distributed	2012 DS	50	7142	B BL	6	0.161389
GrnYld	distributed	2012 DS	50	7142	B BL	7	0.157451
GrnYld	distributed	2012 DS	50	7142	B BL	8	0.100211
GrnYld	distributed	2012 DS	50	7142	B BL	9	0.116796
GrnYld	distributed	2012 DS	50	7142	B BL	10	0.143698
GrnYld	distributed	2012 DS	120	3076	B BL	1	0.194912
GrnYld	distributed	2012 DS	120	3076	B BL	2	0.177932
GrnYld	distributed	2012 DS	120	3076	B BL	3	0.211248
GrnYld	distributed	2012 DS	120	3076	B BL	4	0.207153
GrnYld	distributed	2012 DS	120	3076	B BL	5	0.147454
GrnYld	distributed	2012 DS	120	3076	B BL	6	0.170641
GrnYld	distributed	2012 DS	120	3076	B BL	7	0.198506
GrnYld	distributed	2012 DS	120	3076	B BL	8	0.210762
GrnYld	distributed	2012 DS	120	3076	B BL	9	0.165916
GrnYld	distributed	2012 DS	120	3076	B BL	10	0.20398
GrnYld	distributed	2012 DS	240	1553	B BL	1	0.168568
GrnYld	distributed	2012 DS	240	1553	B BL	2	0.165442
GrnYld	distributed	2012 DS	240	1553	B BL	3	0.184842
GrnYld	distributed	2012 DS	240	1553	B BL	4	0.213189
GrnYld	distributed	2012 DS	240	1553	B BL	5	0.195468
GrnYld	distributed	2012 DS	240	1553	B BL	6	0.184774
GrnYld	distributed	2012 DS	240	1553	B BL	7	0.188839
GrnYld	distributed	2012 DS	240	1553	B BL	8	0.146005
GrnYld	distributed	2012 DS	240	1553	B BL	9	0.168907
GrnYld	distributed	2012 DS	240	1553	B BL	10	0.192933
GrnYld	distributed	2012 DS	480	781	B BL	1	0.146759
GrnYld	distributed	2012 DS	480	781	B BL	2	0.118947
GrnYld	distributed	2012 DS	480	781	B BL	3	0.186174
GrnYld	distributed	2012 DS	480	781	B BL	4	0.115971
GrnYld	distributed	2012 DS	480	781	B BL	5	0.203751
GrnYld	distributed	2012 DS	480	781	B BL	6	0.198523
GrnYld	distributed	2012 DS	480	781	B BL	7	0.171907
GrnYld	distributed	2012 DS	480	781	B BL	8	0.176191
GrnYld	distributed	2012 DS	480	781	B BL	9	0.188692
GrnYld	distributed	2012 DS	480	781	B BL	10	0.175591
GrnYld	distributed	2012 DS	840	448	B BL	1	0.211875
GrnYld	distributed	2012 DS	840	448	B BL	2	0.150753
GrnYld	distributed	2012 DS	840	448	B BL	3	0.193602
GrnYld	distributed	2012 DS	840	448	B BL	4	0.204866
GrnYld	distributed	2012 DS	840	448	B BL	5	0.203164
GrnYld	distributed	2012 DS	840	448	B BL	6	0.254393
GrnYld	distributed	2012 DS	840	448	B BL	7	0.194657
GrnYld	distributed	2012 DS	840	448	B BL	8	0.184055
GrnYld	distributed	2012 DS	840	448	B BL	9	0.169438
GrnYld	distributed	2012 DS	840	448	B BL	10	0.185852
GrnYld	distributed	2012 DS	1200	316	C BL	1	0.227224
GrnYld	distributed	2012 DS	1200	316	C BL	2	0.146036
GrnYld	distributed	2012 DS	1200	316	C BL	3	0.215104
GrnYld	distributed	2012 DS	1200	316	C BL	4	0.143376
GrnYld	distributed	2012 DS	1200	316	C BL	5	0.197146
GrnYld	distributed	2012 DS	1200	316	C BL	6	0.197148
GrnYld	distributed	2012 DS	1200	316	C BL	7	0.145623
GrnYld	distributed	2012 DS	1200	316	C BL	8	0.143655
GrnYld	distributed	2012 DS	1200	316	C BL	9	0.224281
GrnYld	distributed	2012 DS	1200	316	C BL	10	0.219972
GrnYld	distributed	2012 DS	1800	212	C BL	1	0.238489
GrnYld	distributed	2012 DS	1800	212	C BL	2	0.174652
GrnYld	distributed	2012 DS	1800	212	C BL	3	0.145123
GrnYld	distributed	2012 DS	1800	212	C BL	4	0.148414
GrnYld	distributed	2012 DS	1800	212	C BL	5	0.207826
GrnYld	distributed	2012 DS	1800	212	C BL	6	0.190958
GrnYld	distributed	2012 DS	1800	212	C BL	7	0.188692
GrnYld	distributed	2012 DS	1800	212	C BL	8	0.137419
GrnYld	distributed	2012 DS	1800	212	C BL	9	0.118182
GrnYld	distributed	2012 DS	1800	212	C BL	10	0.118225
GrnYld	distributed	2012 DS	2400	161	B BL	1	0.251273
GrnYld	distributed	2012 DS	2400	161	B BL	2	0.228015
GrnYld	distributed	2012 DS	2400	161	B BL	3	0.251641
GrnYld	distributed	2012 DS	2400	161	B BL	4	0.184466
GrnYld	distributed	2012 DS	2400	161	B BL	5	0.185876
GrnYld	distributed	2012 DS	2400	161	B BL	6	0.127757
GrnYld	distributed	2012 DS	2400	161	B BL	7	0.169883
GrnYld	distributed	2012 DS	2400	161	B BL	8	0.149239
GrnYld	distributed	2012 DS	2400	161	B BL	9	0.189659
GrnYld	distributed	2012 DS	2400	161	B BL	10	0.175374
GrnYld	distributed	2012 DS	3600	109	B BL	1	0.228097
GrnYld	distributed	2012 DS	3600	109	B BL	2	0.17319
GrnYld	distributed	2012 DS	3600	109	B BL	3	0.182759
GrnYld	distributed	2012 DS	3600	109	B BL	4	0.153805
GrnYld	distributed	2012 DS	3600	109	B BL	5	0.201844
GrnYld	distributed	2012 DS	3600	109	B BL	6	0.221635
GrnYld	distributed	2012 DS	3600	109	B BL	7	0.194155
GrnYld	distributed	2012 DS	3600	109	B BL	8	0.208869
GrnYld	distributed	2012 DS	3600	109	B BL	9	0.256661
GrnYld	distributed	2012 DS	3600	109	B BL	10	0.136711
GrnYld	distributed	2012 DS	4800	83	B BL	1	0.279717
GrnYld	distributed	2012 DS	4800	83	B BL	2	0.179561
GrnYld	distributed	2012 DS	4800	83	B BL	3	0.218102
GrnYld	distributed	2012 DS	4800	83	B BL	4	0.147025
GrnYld	distributed	2012 DS	4800	83	B BL	5	0.0922285
GrnYld	distributed	2012 DS	4800	83	B BL	6	0.208742
GrnYld	distributed	2012 DS	4800	83	B BL	7	0.117832
GrnYld	distributed	2012 DS	4800	83	B BL	8	0.1634
GrnYld	distributed	2012 DS	4800	83	B BL	9	0.132166
GrnYld	distributed	2012 DS	4800	83	B BL	10	-0.0742635
GrnYld	distributed	2012 DS	25	E 13101	D MLR	1	0.0442488
GrnYld	distributed	2012 DS	25	E 13101	D MLR	2	0.02454
GrnYld	distributed	2012 DS	25	E 13101	D MLR	3	0.0925596
GrnYld	distributed	2012 DS	25	E 13101	D MLR	4	0.0332331
GrnYld	distributed	2012 DS	25	E 13101	D MLR	5	0.0656484
GrnYld	distributed	2012 DS	25	E 13101	D MLR	6	-0.00242707
GrnYld	distributed	2012 DS	25	E 13101	D MLR	7	0.000411254
GrnYld	distributed	2012 DS	25	E 13101	D MLR	8	-0.0150993
GrnYld	distributed	2012 DS	25	E 13101	D MLR	9	0.00209173
GrnYld	distributed	2012 DS	25	E 13101	D MLR	10	0.0537605
GrnYld	distributed	2012 DS	50	E 7142	C MLR	1	0.0255798
GrnYld	distributed	2012 DS	50	E 7142	C MLR	2	0.00869446
GrnYld	distributed	2012 DS	50	E 7142	C MLR	3	-0.00631956
GrnYld	distributed	2012 DS	50	E 7142	C MLR	4	-0.0296776
GrnYld	distributed	2012 DS	50	E 7142	C MLR	5	-0.00446558
GrnYld	distributed	2012 DS	50	E 7142	C MLR	6	0.0470049
GrnYld	distributed	2012 DS	50	E 7142	C MLR	7	0.125714
GrnYld	distributed	2012 DS	50	E 7142	C MLR	8	-0.00686222
GrnYld	distributed	2012 DS	50	E 7142	C MLR	9	0.0652106
GrnYld	distributed	2012 DS	50	E 7142	C MLR	10	-0.00624656
GrnYld	distributed	2012 DS	120	DE 3076	C MLR	1	0.102355
GrnYld	distributed	2012 DS	120	DE 3076	C MLR	2	0.0977796
GrnYld	distributed	2012 DS	120	DE 3076	C MLR	3	0.0779698
GrnYld	distributed	2012 DS	120	DE 3076	C MLR	4	0.0261471
GrnYld	distributed	2012 DS	120	DE 3076	C MLR	5	0.177553
GrnYld	distributed	2012 DS	120	DE 3076	C MLR	6	0.0372165
GrnYld	distributed	2012 DS	120	DE 3076	C MLR	7	0.0924118
GrnYld	distributed	2012 DS	120	DE 3076	C MLR	8	-0.0382532
GrnYld	distributed	2012 DS	120	DE 3076	C MLR	9	-0.0247681
GrnYld	distributed	2012 DS	120	DE 3076	C MLR	10	0.023374
GrnYld	distributed	2012 DS	240	D 1553	C MLR	1	0.196785
GrnYld	distributed	2012 DS	240	D 1553	C MLR	2	0.180039
GrnYld	distributed	2012 DS	240	D 1553	C MLR	3	0.140894
GrnYld	distributed	2012 DS	240	D 1553	C MLR	4	0.159239
GrnYld	distributed	2012 DS	240	D 1553	C MLR	5	0.141695
GrnYld	distributed	2012 DS	240	D 1553	C MLR	6	0.0709783
GrnYld	distributed	2012 DS	240	D 1553	C MLR	7	0.0664077
GrnYld	distributed	2012 DS	240	D 1553	C MLR	8	0.108137
GrnYld	distributed	2012 DS	240	D 1553	C MLR	9	-0.0282871
GrnYld	distributed	2012 DS	240	D 1553	C MLR	10	0.0734651
GrnYld	distributed	2012 DS	480	C 781	B MLR	1	0.178518
GrnYld	distributed	2012 DS	480	C 781	B MLR	2	0.126754
GrnYld	distributed	2012 DS	480	C 781	B MLR	3	0.297937
GrnYld	distributed	2012 DS	480	C 781	B MLR	4	0.267552
GrnYld	distributed	2012 DS	480	C 781	B MLR	5	0.261373
GrnYld	distributed	2012 DS	480	C 781	B MLR	6	0.139117
GrnYld	distributed	2012 DS	480	C 781	B MLR	7	0.171285
GrnYld	distributed	2012 DS	480	C 781	B MLR	8	0.109289
GrnYld	distributed	2012 DS	480	C 781	B MLR	9	0.115809
GrnYld	distributed	2012 DS	480	C 781	B MLR	10	0.123688
GrnYld	distributed	2012 DS	840	AB 448	A MLR	1	0.285501
GrnYld	distributed	2012 DS	840	AB 448	A MLR	2	0.144443
GrnYld	distributed	2012 DS	840	AB 448	A MLR	3	0.172378
GrnYld	distributed	2012 DS	840	AB 448	A MLR	4	0.337359
GrnYld	distributed	2012 DS	840	AB 448	A MLR	5	0.217976
GrnYld	distributed	2012 DS	840	AB 448	A MLR	6	0.34303
GrnYld	distributed	2012 DS	840	AB 448	A MLR	7	0.197719
GrnYld	distributed	2012 DS	840	AB 448	A MLR	8	0.232926
GrnYld	distributed	2012 DS	840	AB 448	A MLR	9	0.238762
GrnYld	distributed	2012 DS	840	AB 448	A MLR	10	0.187567
GrnYld	distributed	2012 DS	1200	ABC 316	B MLR	1	0.33848
GrnYld	distributed	2012 DS	1200	ABC 316	B MLR	2	0.186332
GrnYld	distributed	2012 DS	1200	ABC 316	B MLR	3	0.203004
GrnYld	distributed	2012 DS	1200	ABC 316	B MLR	4	0.195565
GrnYld	distributed	2012 DS	1200	ABC 316	B MLR	5	0.185349
GrnYld	distributed	2012 DS	1200	ABC 316	B MLR	6	0.301007
GrnYld	distributed	2012 DS	1200	ABC 316	B MLR	7	0.166976
GrnYld	distributed	2012 DS	1200	ABC 316	B MLR	8	0.195962
GrnYld	distributed	2012 DS	1200	ABC 316	B MLR	9	0.24167
GrnYld	distributed	2012 DS	1200	ABC 316	B MLR	10	0.213549
GrnYld	distributed	2012 DS	1800	ABC 212	B MLR	1	0.370538
GrnYld	distributed	2012 DS	1800	ABC 212	B MLR	2	0.226656
GrnYld	distributed	2012 DS	1800	ABC 212	B MLR	3	0.181726
GrnYld	distributed	2012 DS	1800	ABC 212	B MLR	4	0.244563
GrnYld	distributed	2012 DS	1800	ABC 212	B MLR	5	0.161147
GrnYld	distributed	2012 DS	1800	ABC 212	B MLR	6	0.211164
GrnYld	distributed	2012 DS	1800	ABC 212	B MLR	7	0.239658
GrnYld	distributed	2012 DS	1800	ABC 212	B MLR	8	0.183504
GrnYld	distributed	2012 DS	1800	ABC 212	B MLR	9	0.261474
GrnYld	distributed	2012 DS	1800	ABC 212	B MLR	10	0.163773
GrnYld	distributed	2012 DS	2400	AB 161	A MLR	1	0.347749
GrnYld	distributed	2012 DS	2400	AB 161	A MLR	2	0.324826
GrnYld	distributed	2012 DS	2400	AB 161	A MLR	3	0.252238
GrnYld	distributed	2012 DS	2400	AB 161	A MLR	4	0.322017
GrnYld	distributed	2012 DS	2400	AB 161	A MLR	5	0.156949
GrnYld	distributed	2012 DS	2400	AB 161	A MLR	6	0.184149
GrnYld	distributed	2012 DS	2400	AB 161	A MLR	7	0.222315
GrnYld	distributed	2012 DS	2400	AB 161	A MLR	8	0.247626
GrnYld	distributed	2012 DS	2400	AB 161	A MLR	9	0.271996
GrnYld	distributed	2012 DS	2400	AB 161	A MLR	10	0.241846
GrnYld	distributed	2012 DS	3600	A 109	A MLR	1	0.302531
GrnYld	distributed	2012 DS	3600	A 109	A MLR	2	0.223101
GrnYld	distributed	2012 DS	3600	A 109	A MLR	3	0.244709
GrnYld	distributed	2012 DS	3600	A 109	A MLR	4	0.260263
GrnYld	distributed	2012 DS	3600	A 109	A MLR	5	0.273914
GrnYld	distributed	2012 DS	3600	A 109	A MLR	6	0.251467
GrnYld	distributed	2012 DS	3600	A 109	A MLR	7	0.287776
GrnYld	distributed	2012 DS	3600	A 109	A MLR	8	0.226338
GrnYld	distributed	2012 DS	3600	A 109	A MLR	9	0.387844
GrnYld	distributed	2012 DS	3600	A 109	A MLR	10	0.235253
GrnYld	distributed	2012 DS	4800	ABC 83	AB MLR	1	0.348303
GrnYld	distributed	2012 DS	4800	ABC 83	AB MLR	2	0.292065
GrnYld	distributed	2012 DS	4800	ABC 83	AB MLR	3	0.276066
GrnYld	distributed	2012 DS	4800	ABC 83	AB MLR	4	0.240376
GrnYld	distributed	2012 DS	4800	ABC 83	AB MLR	5	0.186316
GrnYld	distributed	2012 DS	4800	ABC 83	AB MLR	6	0.249588
GrnYld	distributed	2012 DS	4800	ABC 83	AB MLR	7	0.191354
GrnYld	distributed	2012 DS	4800	ABC 83	AB MLR	8	0.266676
GrnYld	distributed	2012 DS	4800	ABC 83	AB MLR	9	0.127809
GrnYld	distributed	2012 DS	4800	ABC 83	AB MLR	10	0.0447389
GrnYld	distributed	2012 DS	25	ABC 13101	B RF	1	0.284452
GrnYld	distributed	2012 DS	25	ABC 13101	B RF	2	0.276968
GrnYld	distributed	2012 DS	25	ABC 13101	B RF	3	0.265263
GrnYld	distributed	2012 DS	25	ABC 13101	B RF	4	0.291421
GrnYld	distributed	2012 DS	25	ABC 13101	B RF	5	0.258757
GrnYld	distributed	2012 DS	25	ABC 13101	B RF	6	0.29169
GrnYld	distributed	2012 DS	25	ABC 13101	B RF	7	0.267285
GrnYld	distributed	2012 DS	25	ABC 13101	B RF	8	0.260754
GrnYld	distributed	2012 DS	25	ABC 13101	B RF	9	0.276554
GrnYld	distributed	2012 DS	25	ABC 13101	B RF	10	0.241399
GrnYld	distributed	2012 DS	50	AB 7142	A RF	1	0.286999
GrnYld	distributed	2012 DS	50	AB 7142	A RF	2	0.232062
GrnYld	distributed	2012 DS	50	AB 7142	A RF	3	0.264065
GrnYld	distributed	2012 DS	50	AB 7142	A RF	4	0.292839
GrnYld	distributed	2012 DS	50	AB 7142	A RF	5	0.262421
GrnYld	distributed	2012 DS	50	AB 7142	A RF	6	0.27285
GrnYld	distributed	2012 DS	50	AB 7142	A RF	7	0.271808
GrnYld	distributed	2012 DS	50	AB 7142	A RF	8	0.301655
GrnYld	distributed	2012 DS	50	AB 7142	A RF	9	0.276923
GrnYld	distributed	2012 DS	50	AB 7142	A RF	10	0.278968
GrnYld	distributed	2012 DS	120	BCD 3076	A RF	1	0.250049
GrnYld	distributed	2012 DS	120	BCD 3076	A RF	2	0.214782
GrnYld	distributed	2012 DS	120	BCD 3076	A RF	3	0.217195
GrnYld	distributed	2012 DS	120	BCD 3076	A RF	4	0.266117
GrnYld	distributed	2012 DS	120	BCD 3076	A RF	5	0.251717
GrnYld	distributed	2012 DS	120	BCD 3076	A RF	6	0.268789
GrnYld	distributed	2012 DS	120	BCD 3076	A RF	7	0.264844
GrnYld	distributed	2012 DS	120	BCD 3076	A RF	8	0.270339
GrnYld	distributed	2012 DS	120	BCD 3076	A RF	9	0.252547
GrnYld	distributed	2012 DS	120	BCD 3076	A RF	10	0.278832
GrnYld	distributed	2012 DS	240	BCD 1553	A RF	1	0.27732
GrnYld	distributed	2012 DS	240	BCD 1553	A RF	2	0.270541
GrnYld	distributed	2012 DS	240	BCD 1553	A RF	3	0.230478
GrnYld	distributed	2012 DS	240	BCD 1553	A RF	4	0.219145
GrnYld	distributed	2012 DS	240	BCD 1553	A RF	5	0.245271
GrnYld	distributed	2012 DS	240	BCD 1553	A RF	6	0.230527
GrnYld	distributed	2012 DS	240	BCD 1553	A RF	7	0.275549
GrnYld	distributed	2012 DS	240	BCD 1553	A RF	8	0.259776
GrnYld	distributed	2012 DS	240	BCD 1553	A RF	9	0.248363
GrnYld	distributed	2012 DS	240	BCD 1553	A RF	10	0.266004
GrnYld	distributed	2012 DS	480	D 781	A RF	1	0.253375
GrnYld	distributed	2012 DS	480	D 781	A RF	2	0.251887
GrnYld	distributed	2012 DS	480	D 781	A RF	3	0.254786
GrnYld	distributed	2012 DS	480	D 781	A RF	4	0.230858
GrnYld	distributed	2012 DS	480	D 781	A RF	5	0.252088
GrnYld	distributed	2012 DS	480	D 781	A RF	6	0.234463
GrnYld	distributed	2012 DS	480	D 781	A RF	7	0.191729
GrnYld	distributed	2012 DS	480	D 781	A RF	8	0.204108
GrnYld	distributed	2012 DS	480	D 781	A RF	9	0.243498
GrnYld	distributed	2012 DS	480	D 781	A RF	10	0.275744
GrnYld	distributed	2012 DS	840	CD 448	A RF	1	0.24927
GrnYld	distributed	2012 DS	840	CD 448	A RF	2	0.187701
GrnYld	distributed	2012 DS	840	CD 448	A RF	3	0.205681
GrnYld	distributed	2012 DS	840	CD 448	A RF	4	0.278036
GrnYld	distributed	2012 DS	840	CD 448	A RF	5	0.250377
GrnYld	distributed	2012 DS	840	CD 448	A RF	6	0.29398
GrnYld	distributed	2012 DS	840	CD 448	A RF	7	0.261964
GrnYld	distributed	2012 DS	840	CD 448	A RF	8	0.2414
GrnYld	distributed	2012 DS	840	CD 448	A RF	9	0.243989
GrnYld	distributed	2012 DS	840	CD 448	A RF	10	0.267583
GrnYld	distributed	2012 DS	1200	A 316	A RF	1	0.299399
GrnYld	distributed	2012 DS	1200	A 316	A RF	2	0.281469
GrnYld	distributed	2012 DS	1200	A 316	A RF	3	0.29169
GrnYld	distributed	2012 DS	1200	A 316	A RF	4	0.296278
GrnYld	distributed	2012 DS	1200	A 316	A RF	5	0.256946
GrnYld	distributed	2012 DS	1200	A 316	A RF	6	0.326953
GrnYld	distributed	2012 DS	1200	A 316	A RF	7	0.276923
GrnYld	distributed	2012 DS	1200	A 316	A RF	8	0.261399
GrnYld	distributed	2012 DS	1200	A 316	A RF	9	0.264466
GrnYld	distributed	2012 DS	1200	A 316	A RF	10	0.279973
GrnYld	distributed	2012 DS	1800	ABC 212	A RF	1	0.283713
GrnYld	distributed	2012 DS	1800	ABC 212	A RF	2	0.312563
GrnYld	distributed	2012 DS	1800	ABC 212	A RF	3	0.256436
GrnYld	distributed	2012 DS	1800	ABC 212	A RF	4	0.285002
GrnYld	distributed	2012 DS	1800	ABC 212	A RF	5	0.304968
GrnYld	distributed	2012 DS	1800	ABC 212	A RF	6	0.317238
GrnYld	distributed	2012 DS	1800	ABC 212	A RF	7	0.264477
GrnYld	distributed	2012 DS	1800	ABC 212	A RF	8	0.242306
GrnYld	distributed	2012 DS	1800	ABC 212	A RF	9	0.213537
GrnYld	distributed	2012 DS	1800	ABC 212	A RF	10	0.236357
GrnYld	distributed	2012 DS	2400	ABC 161	A RF	1	0.300091
GrnYld	distributed	2012 DS	2400	ABC 161	A RF	2	0.277483
GrnYld	distributed	2012 DS	2400	ABC 161	A RF	3	0.335135
GrnYld	distributed	2012 DS	2400	ABC 161	A RF	4	0.305769
GrnYld	distributed	2012 DS	2400	ABC 161	A RF	5	0.227615
GrnYld	distributed	2012 DS	2400	ABC 161	A RF	6	0.259978
GrnYld	distributed	2012 DS	2400	ABC 161	A RF	7	0.254651
GrnYld	distributed	2012 DS	2400	ABC 161	A RF	8	0.245854
GrnYld	distributed	2012 DS	2400	ABC 161	A RF	9	0.246018
GrnYld	distributed	2012 DS	2400	ABC 161	A RF	10	0.269425
GrnYld	distributed	2012 DS	3600	ABC 109	A RF	1	0.234945
GrnYld	distributed	2012 DS	3600	ABC 109	A RF	2	0.284907
GrnYld	distributed	2012 DS	3600	ABC 109	A RF	3	0.235436
GrnYld	distributed	2012 DS	3600	ABC 109	A RF	4	0.314389
GrnYld	distributed	2012 DS	3600	ABC 109	A RF	5	0.29121
GrnYld	distributed	2012 DS	3600	ABC 109	A RF	6	0.279157
GrnYld	distributed	2012 DS	3600	ABC 109	A RF	7	0.27398
GrnYld	distributed	2012 DS	3600	ABC 109	A RF	8	0.281371
GrnYld	distributed	2012 DS	3600	ABC 109	A RF	9	0.288801
GrnYld	distributed	2012 DS	3600	ABC 109	A RF	10	0.241454
GrnYld	distributed	2012 DS	4800	D 83	A RF	1	0.248089
GrnYld	distributed	2012 DS	4800	D 83	A RF	2	0.235793
GrnYld	distributed	2012 DS	4800	D 83	A RF	3	0.298368
GrnYld	distributed	2012 DS	4800	D 83	A RF	4	0.214629
GrnYld	distributed	2012 DS	4800	D 83	A RF	5	0.257666
GrnYld	distributed	2012 DS	4800	D 83	A RF	6	0.253004
GrnYld	distributed	2012 DS	4800	D 83	A RF	7	0.230974
GrnYld	distributed	2012 DS	4800	D 83	A RF	8	0.252576
GrnYld	distributed	2012 DS	4800	D 83	A RF	9	0.222163
GrnYld	distributed	2012 DS	4800	D 83	A RF	10	0.0937936
GrnYld	distributed	2012 DS	25	A 13101	B RKHS	1	0.273402
GrnYld	distributed	2012 DS	25	A 13101	B RKHS	2	0.285041
GrnYld	distributed	2012 DS	25	A 13101	B RKHS	3	0.274682
GrnYld	distributed	2012 DS	25	A 13101	B RKHS	4	0.286148
GrnYld	distributed	2012 DS	25	A 13101	B RKHS	5	0.286817
GrnYld	distributed	2012 DS	25	A 13101	B RKHS	6	0.291658
GrnYld	distributed	2012 DS	25	A 13101	B RKHS	7	0.28331
GrnYld	distributed	2012 DS	25	A 13101	B RKHS	8	0.278638
GrnYld	distributed	2012 DS	25	A 13101	B RKHS	9	0.277579
GrnYld	distributed	2012 DS	25	A 13101	B RKHS	10	0.273373
GrnYld	distributed	2012 DS	50	AB 7142	A RKHS	1	0.26839
GrnYld	distributed	2012 DS	50	AB 7142	A RKHS	2	0.276103
GrnYld	distributed	2012 DS	50	AB 7142	A RKHS	3	0.272498
GrnYld	distributed	2012 DS	50	AB 7142	A RKHS	4	0.260479
GrnYld	distributed	2012 DS	50	AB 7142	A RKHS	5	0.289082
GrnYld	distributed	2012 DS	50	AB 7142	A RKHS	6	0.271973
GrnYld	distributed	2012 DS	50	AB 7142	A RKHS	7	0.295451
GrnYld	distributed	2012 DS	50	AB 7142	A RKHS	8	0.261781
GrnYld	distributed	2012 DS	50	AB 7142	A RKHS	9	0.263343
GrnYld	distributed	2012 DS	50	AB 7142	A RKHS	10	0.260506
GrnYld	distributed	2012 DS	120	AB 3076	A RKHS	1	0.239543
GrnYld	distributed	2012 DS	120	AB 3076	A RKHS	2	0.238951
GrnYld	distributed	2012 DS	120	AB 3076	A RKHS	3	0.259043
GrnYld	distributed	2012 DS	120	AB 3076	A RKHS	4	0.29444
GrnYld	distributed	2012 DS	120	AB 3076	A RKHS	5	0.243244
GrnYld	distributed	2012 DS	120	AB 3076	A RKHS	6	0.258266
GrnYld	distributed	2012 DS	120	AB 3076	A RKHS	7	0.285464
GrnYld	distributed	2012 DS	120	AB 3076	A RKHS	8	0.295804
GrnYld	distributed	2012 DS	120	AB 3076	A RKHS	9	0.29349
GrnYld	distributed	2012 DS	120	AB 3076	A RKHS	10	0.307515
GrnYld	distributed	2012 DS	240	BC 1553	A RKHS	1	0.234958
GrnYld	distributed	2012 DS	240	BC 1553	A RKHS	2	0.21041
GrnYld	distributed	2012 DS	240	BC 1553	A RKHS	3	0.233841
GrnYld	distributed	2012 DS	240	BC 1553	A RKHS	4	0.26905
GrnYld	distributed	2012 DS	240	BC 1553	A RKHS	5	0.25398
GrnYld	distributed	2012 DS	240	BC 1553	A RKHS	6	0.242374
GrnYld	distributed	2012 DS	240	BC 1553	A RKHS	7	0.237791
GrnYld	distributed	2012 DS	240	BC 1553	A RKHS	8	0.221759
GrnYld	distributed	2012 DS	240	BC 1553	A RKHS	9	0.252971
GrnYld	distributed	2012 DS	240	BC 1553	A RKHS	10	0.276862
GrnYld	distributed	2012 DS	480	CD 781	A RKHS	1	0.207056
GrnYld	distributed	2012 DS	480	CD 781	A RKHS	2	0.225389
GrnYld	distributed	2012 DS	480	CD 781	A RKHS	3	0.217193
GrnYld	distributed	2012 DS	480	CD 781	A RKHS	4	0.171379
GrnYld	distributed	2012 DS	480	CD 781	A RKHS	5	0.240226
GrnYld	distributed	2012 DS	480	CD 781	A RKHS	6	0.239181
GrnYld	distributed	2012 DS	480	CD 781	A RKHS	7	0.199606
GrnYld	distributed	2012 DS	480	CD 781	A RKHS	8	0.221203
GrnYld	distributed	2012 DS	480	CD 781	A RKHS	9	0.249813
GrnYld	distributed	2012 DS	480	CD 781	A RKHS	10	0.233536
GrnYld	distributed	2012 DS	840	CD 448	A RKHS	1	0.248987
GrnYld	distributed	2012 DS	840	CD 448	A RKHS	2	0.227684
GrnYld	distributed	2012 DS	840	CD 448	A RKHS	3	0.242462
GrnYld	distributed	2012 DS	840	CD 448	A RKHS	4	0.257142
GrnYld	distributed	2012 DS	840	CD 448	A RKHS	5	0.234631
GrnYld	distributed	2012 DS	840	CD 448	A RKHS	6	0.275454
GrnYld	distributed	2012 DS	840	CD 448	A RKHS	7	0.225018
GrnYld	distributed	2012 DS	840	CD 448	A RKHS	8	0.197421
GrnYld	distributed	2012 DS	840	CD 448	A RKHS	9	0.226085
GrnYld	distributed	2012 DS	840	CD 448	A RKHS	10	0.244126
GrnYld	distributed	2012 DS	1200	CD 316	BC RKHS	1	0.241943
GrnYld	distributed	2012 DS	1200	CD 316	BC RKHS	2	0.195254
GrnYld	distributed	2012 DS	1200	CD 316	BC RKHS	3	0.252875
GrnYld	distributed	2012 DS	1200	CD 316	BC RKHS	4	0.192866
GrnYld	distributed	2012 DS	1200	CD 316	BC RKHS	5	0.218189
GrnYld	distributed	2012 DS	1200	CD 316	BC RKHS	6	0.210182
GrnYld	distributed	2012 DS	1200	CD 316	BC RKHS	7	0.186129
GrnYld	distributed	2012 DS	1200	CD 316	BC RKHS	8	0.149315
GrnYld	distributed	2012 DS	1200	CD 316	BC RKHS	9	0.251031
GrnYld	distributed	2012 DS	1200	CD 316	BC RKHS	10	0.234093
GrnYld	distributed	2012 DS	1800	DE 212	BC RKHS	1	0.258433
GrnYld	distributed	2012 DS	1800	DE 212	BC RKHS	2	0.220285
GrnYld	distributed	2012 DS	1800	DE 212	BC RKHS	3	0.217751
GrnYld	distributed	2012 DS	1800	DE 212	BC RKHS	4	0.209927
GrnYld	distributed	2012 DS	1800	DE 212	BC RKHS	5	0.240397
GrnYld	distributed	2012 DS	1800	DE 212	BC RKHS	6	0.215513
GrnYld	distributed	2012 DS	1800	DE 212	BC RKHS	7	0.203555
GrnYld	distributed	2012 DS	1800	DE 212	BC RKHS	8	0.165366
GrnYld	distributed	2012 DS	1800	DE 212	BC RKHS	9	0.168682
GrnYld	distributed	2012 DS	1800	DE 212	BC RKHS	10	0.145564
GrnYld	distributed	2012 DS	2400	CD 161	B RKHS	1	0.251351
GrnYld	distributed	2012 DS	2400	CD 161	B RKHS	2	0.271918
GrnYld	distributed	2012 DS	2400	CD 161	B RKHS	3	0.274245
GrnYld	distributed	2012 DS	2400	CD 161	B RKHS	4	0.219227
GrnYld	distributed	2012 DS	2400	CD 161	B RKHS	5	0.206802
GrnYld	distributed	2012 DS	2400	CD 161	B RKHS	6	0.159186
GrnYld	distributed	2012 DS	2400	CD 161	B RKHS	7	0.192588
GrnYld	distributed	2012 DS	2400	CD 161	B RKHS	8	0.158515
GrnYld	distributed	2012 DS	2400	CD 161	B RKHS	9	0.196377
GrnYld	distributed	2012 DS	2400	CD 161	B RKHS	10	0.210628
GrnYld	distributed	2012 DS	3600	CD 109	B RKHS	1	0.245693
GrnYld	distributed	2012 DS	3600	CD 109	B RKHS	2	0.24666
GrnYld	distributed	2012 DS	3600	CD 109	B RKHS	3	0.243475
GrnYld	distributed	2012 DS	3600	CD 109	B RKHS	4	0.24819
GrnYld	distributed	2012 DS	3600	CD 109	B RKHS	5	0.21354
GrnYld	distributed	2012 DS	3600	CD 109	B RKHS	6	0.290913
GrnYld	distributed	2012 DS	3600	CD 109	B RKHS	7	0.214532
GrnYld	distributed	2012 DS	3600	CD 109	B RKHS	8	0.208268
GrnYld	distributed	2012 DS	3600	CD 109	B RKHS	9	0.248311
GrnYld	distributed	2012 DS	3600	CD 109	B RKHS	10	0.138099
GrnYld	distributed	2012 DS	4800	E 83	AB RKHS	1	0.286157
GrnYld	distributed	2012 DS	4800	E 83	AB RKHS	2	0.197064
GrnYld	distributed	2012 DS	4800	E 83	AB RKHS	3	0.262422
GrnYld	distributed	2012 DS	4800	E 83	AB RKHS	4	0.199261
GrnYld	distributed	2012 DS	4800	E 83	AB RKHS	5	0.138241
GrnYld	distributed	2012 DS	4800	E 83	AB RKHS	6	0.234283
GrnYld	distributed	2012 DS	4800	E 83	AB RKHS	7	0.188429
GrnYld	distributed	2012 DS	4800	E 83	AB RKHS	8	0.160448
GrnYld	distributed	2012 DS	4800	E 83	AB RKHS	9	0.133466
GrnYld	distributed	2012 DS	4800	E 83	AB RKHS	10	-0.0315425
GrnYld	distributed	2012 DS	25	A 13101	A rrBLUP	1	0.287116
GrnYld	distributed	2012 DS	25	A 13101	A rrBLUP	2	0.299836
GrnYld	distributed	2012 DS	25	A 13101	A rrBLUP	3	0.290972
GrnYld	distributed	2012 DS	25	A 13101	A rrBLUP	4	0.306126
GrnYld	distributed	2012 DS	25	A 13101	A rrBLUP	5	0.306487
GrnYld	distributed	2012 DS	25	A 13101	A rrBLUP	6	0.312522
GrnYld	distributed	2012 DS	25	A 13101	A rrBLUP	7	0.304148
GrnYld	distributed	2012 DS	25	A 13101	A rrBLUP	8	0.299828
GrnYld	distributed	2012 DS	25	A 13101	A rrBLUP	9	0.30227
GrnYld	distributed	2012 DS	25	A 13101	A rrBLUP	10	0.296072
GrnYld	distributed	2012 DS	50	A 7142	A rrBLUP	1	0.275893
GrnYld	distributed	2012 DS	50	A 7142	A rrBLUP	2	0.289716
GrnYld	distributed	2012 DS	50	A 7142	A rrBLUP	3	0.286658
GrnYld	distributed	2012 DS	50	A 7142	A rrBLUP	4	0.273777
GrnYld	distributed	2012 DS	50	A 7142	A rrBLUP	5	0.304412
GrnYld	distributed	2012 DS	50	A 7142	A rrBLUP	6	0.28685
GrnYld	distributed	2012 DS	50	A 7142	A rrBLUP	7	0.312509
GrnYld	distributed	2012 DS	50	A 7142	A rrBLUP	8	0.28712
GrnYld	distributed	2012 DS	50	A 7142	A rrBLUP	9	0.289319
GrnYld	distributed	2012 DS	50	A 7142	A rrBLUP	10	0.290765
GrnYld	distributed	2012 DS	120	A 3076	A rrBLUP	1	0.235892
GrnYld	distributed	2012 DS	120	A 3076	A rrBLUP	2	0.237433
GrnYld	distributed	2012 DS	120	A 3076	A rrBLUP	3	0.264342
GrnYld	distributed	2012 DS	120	A 3076	A rrBLUP	4	0.302192
GrnYld	distributed	2012 DS	120	A 3076	A rrBLUP	5	0.25099
GrnYld	distributed	2012 DS	120	A 3076	A rrBLUP	6	0.266294
GrnYld	distributed	2012 DS	120	A 3076	A rrBLUP	7	0.295009
GrnYld	distributed	2012 DS	120	A 3076	A rrBLUP	8	0.300987
GrnYld	distributed	2012 DS	120	A 3076	A rrBLUP	9	0.302366
GrnYld	distributed	2012 DS	120	A 3076	A rrBLUP	10	0.326871
GrnYld	distributed	2012 DS	240	BC 1553	A rrBLUP	1	0.209156
GrnYld	distributed	2012 DS	240	BC 1553	A rrBLUP	2	0.194449
GrnYld	distributed	2012 DS	240	BC 1553	A rrBLUP	3	0.235004
GrnYld	distributed	2012 DS	240	BC 1553	A rrBLUP	4	0.270471
GrnYld	distributed	2012 DS	240	BC 1553	A rrBLUP	5	0.249964
GrnYld	distributed	2012 DS	240	BC 1553	A rrBLUP	6	0.244333
GrnYld	distributed	2012 DS	240	BC 1553	A rrBLUP	7	0.245122
GrnYld	distributed	2012 DS	240	BC 1553	A rrBLUP	8	0.222986
GrnYld	distributed	2012 DS	240	BC 1553	A rrBLUP	9	0.245547
GrnYld	distributed	2012 DS	240	BC 1553	A rrBLUP	10	0.278925
GrnYld	distributed	2012 DS	480	CDE 781	AB rrBLUP	1	0.172324
GrnYld	distributed	2012 DS	480	CDE 781	AB rrBLUP	2	0.169451
GrnYld	distributed	2012 DS	480	CDE 781	AB rrBLUP	3	0.213752
GrnYld	distributed	2012 DS	480	CDE 781	AB rrBLUP	4	0.138234
GrnYld	distributed	2012 DS	480	CDE 781	AB rrBLUP	5	0.239593
GrnYld	distributed	2012 DS	480	CDE 781	AB rrBLUP	6	0.226625
GrnYld	distributed	2012 DS	480	CDE 781	AB rrBLUP	7	0.203336
GrnYld	distributed	2012 DS	480	CDE 781	AB rrBLUP	8	0.206329
GrnYld	distributed	2012 DS	480	CDE 781	AB rrBLUP	9	0.248787
GrnYld	distributed	2012 DS	480	CDE 781	AB rrBLUP	10	0.223422
GrnYld	distributed	2012 DS	840	CD 448	AB rrBLUP	1	0.225216
GrnYld	distributed	2012 DS	840	CD 448	AB rrBLUP	2	0.172852
GrnYld	distributed	2012 DS	840	CD 448	AB rrBLUP	3	0.203905
GrnYld	distributed	2012 DS	840	CD 448	AB rrBLUP	4	0.217656
GrnYld	distributed	2012 DS	840	CD 448	AB rrBLUP	5	0.224878
GrnYld	distributed	2012 DS	840	CD 448	AB rrBLUP	6	0.265322
GrnYld	distributed	2012 DS	840	CD 448	AB rrBLUP	7	0.205775
GrnYld	distributed	2012 DS	840	CD 448	AB rrBLUP	8	0.195035
GrnYld	distributed	2012 DS	840	CD 448	AB rrBLUP	9	0.195854
GrnYld	distributed	2012 DS	840	CD 448	AB rrBLUP	10	0.22909
GrnYld	distributed	2012 DS	1200	DE 316	C rrBLUP	1	0.23418
GrnYld	distributed	2012 DS	1200	DE 316	C rrBLUP	2	0.153668
GrnYld	distributed	2012 DS	1200	DE 316	C rrBLUP	3	0.221175
GrnYld	distributed	2012 DS	1200	DE 316	C rrBLUP	4	0.141988
GrnYld	distributed	2012 DS	1200	DE 316	C rrBLUP	5	0.200493
GrnYld	distributed	2012 DS	1200	DE 316	C rrBLUP	6	0.171001
GrnYld	distributed	2012 DS	1200	DE 316	C rrBLUP	7	0.148172
GrnYld	distributed	2012 DS	1200	DE 316	C rrBLUP	8	0.125912
GrnYld	distributed	2012 DS	1200	DE 316	C rrBLUP	9	0.238811
GrnYld	distributed	2012 DS	1200	DE 316	C rrBLUP	10	0.222039
GrnYld	distributed	2012 DS	1800	EF 212	C rrBLUP	1	0.244178
GrnYld	distributed	2012 DS	1800	EF 212	C rrBLUP	2	0.174327
GrnYld	distributed	2012 DS	1800	EF 212	C rrBLUP	3	0.158026
GrnYld	distributed	2012 DS	1800	EF 212	C rrBLUP	4	0.142027
GrnYld	distributed	2012 DS	1800	EF 212	C rrBLUP	5	0.216668
GrnYld	distributed	2012 DS	1800	EF 212	C rrBLUP	6	0.196423
GrnYld	distributed	2012 DS	1800	EF 212	C rrBLUP	7	0.170825
GrnYld	distributed	2012 DS	1800	EF 212	C rrBLUP	8	0.129357
GrnYld	distributed	2012 DS	1800	EF 212	C rrBLUP	9	0.135277
GrnYld	distributed	2012 DS	1800	EF 212	C rrBLUP	10	0.121672
GrnYld	distributed	2012 DS	2400	DE 161	B rrBLUP	1	0.245151
GrnYld	distributed	2012 DS	2400	DE 161	B rrBLUP	2	0.244107
GrnYld	distributed	2012 DS	2400	DE 161	B rrBLUP	3	0.256946
GrnYld	distributed	2012 DS	2400	DE 161	B rrBLUP	4	0.18188
GrnYld	distributed	2012 DS	2400	DE 161	B rrBLUP	5	0.181376
GrnYld	distributed	2012 DS	2400	DE 161	B rrBLUP	6	0.131042
GrnYld	distributed	2012 DS	2400	DE 161	B rrBLUP	7	0.180526
GrnYld	distributed	2012 DS	2400	DE 161	B rrBLUP	8	0.143554
GrnYld	distributed	2012 DS	2400	DE 161	B rrBLUP	9	0.187829
GrnYld	distributed	2012 DS	2400	DE 161	B rrBLUP	10	0.190569
GrnYld	distributed	2012 DS	3600	DE 109	B rrBLUP	1	0.240274
GrnYld	distributed	2012 DS	3600	DE 109	B rrBLUP	2	0.170743
GrnYld	distributed	2012 DS	3600	DE 109	B rrBLUP	3	0.194152
GrnYld	distributed	2012 DS	3600	DE 109	B rrBLUP	4	0.161652
GrnYld	distributed	2012 DS	3600	DE 109	B rrBLUP	5	0.202669
GrnYld	distributed	2012 DS	3600	DE 109	B rrBLUP	6	0.251892
GrnYld	distributed	2012 DS	3600	DE 109	B rrBLUP	7	0.192875
GrnYld	distributed	2012 DS	3600	DE 109	B rrBLUP	8	0.202041
GrnYld	distributed	2012 DS	3600	DE 109	B rrBLUP	9	0.245388
GrnYld	distributed	2012 DS	3600	DE 109	B rrBLUP	10	0.11602
GrnYld	distributed	2012 DS	4800	F 83	B rrBLUP	1	0.280004
GrnYld	distributed	2012 DS	4800	F 83	B rrBLUP	2	0.173321
GrnYld	distributed	2012 DS	4800	F 83	B rrBLUP	3	0.217761
GrnYld	distributed	2012 DS	4800	F 83	B rrBLUP	4	0.151968
GrnYld	distributed	2012 DS	4800	F 83	B rrBLUP	5	0.110207
GrnYld	distributed	2012 DS	4800	F 83	B rrBLUP	6	0.202387
GrnYld	distributed	2012 DS	4800	F 83	B rrBLUP	7	0.127657
GrnYld	distributed	2012 DS	4800	F 83	B rrBLUP	8	0.157153
GrnYld	distributed	2012 DS	4800	F 83	B rrBLUP	9	0.115335
GrnYld	distributed	2012 DS	4800	F 83	B rrBLUP	10	-0.0791588
GrnYld	distributed	2012 WS	25	ABC 13101	C BL	1	0.175751
GrnYld	distributed	2012 WS	25	ABC 13101	C BL	2	0.168528
GrnYld	distributed	2012 WS	25	ABC 13101	C BL	3	0.135095
GrnYld	distributed	2012 WS	25	ABC 13101	C BL	4	0.157248
GrnYld	distributed	2012 WS	25	ABC 13101	C BL	5	0.181427
GrnYld	distributed	2012 WS	25	ABC 13101	C BL	6	0.145333
GrnYld	distributed	2012 WS	25	ABC 13101	C BL	7	0.161802
GrnYld	distributed	2012 WS	25	ABC 13101	C BL	8	0.176494
GrnYld	distributed	2012 WS	25	ABC 13101	C BL	9	0.128259
GrnYld	distributed	2012 WS	25	ABC 13101	C BL	10	0.137056
GrnYld	distributed	2012 WS	50	BCDE 7142	C BL	1	0.17892
GrnYld	distributed	2012 WS	50	BCDE 7142	C BL	2	0.175185
GrnYld	distributed	2012 WS	50	BCDE 7142	C BL	3	0.172497
GrnYld	distributed	2012 WS	50	BCDE 7142	C BL	4	0.145723
GrnYld	distributed	2012 WS	50	BCDE 7142	C BL	5	0.158236
GrnYld	distributed	2012 WS	50	BCDE 7142	C BL	6	0.142182
GrnYld	distributed	2012 WS	50	BCDE 7142	C BL	7	0.138876
GrnYld	distributed	2012 WS	50	BCDE 7142	C BL	8	0.116141
GrnYld	distributed	2012 WS	50	BCDE 7142	C BL	9	0.0921683
GrnYld	distributed	2012 WS	50	BCDE 7142	C BL	10	0.0929331
GrnYld	distributed	2012 WS	120	ABC 3076	C BL	1	0.14839
GrnYld	distributed	2012 WS	120	ABC 3076	C BL	2	0.15849
GrnYld	distributed	2012 WS	120	ABC 3076	C BL	3	0.161979
GrnYld	distributed	2012 WS	120	ABC 3076	C BL	4	0.194956
GrnYld	distributed	2012 WS	120	ABC 3076	C BL	5	0.133614
GrnYld	distributed	2012 WS	120	ABC 3076	C BL	6	0.136135
GrnYld	distributed	2012 WS	120	ABC 3076	C BL	7	0.174567
GrnYld	distributed	2012 WS	120	ABC 3076	C BL	8	0.145311
GrnYld	distributed	2012 WS	120	ABC 3076	C BL	9	0.169768
GrnYld	distributed	2012 WS	120	ABC 3076	C BL	10	0.187877
GrnYld	distributed	2012 WS	240	ABCD 1553	C BL	1	0.154246
GrnYld	distributed	2012 WS	240	ABCD 1553	C BL	2	0.148154
GrnYld	distributed	2012 WS	240	ABCD 1553	C BL	3	0.156333
GrnYld	distributed	2012 WS	240	ABCD 1553	C BL	4	0.191137
GrnYld	distributed	2012 WS	240	ABCD 1553	C BL	5	0.17085
GrnYld	distributed	2012 WS	240	ABCD 1553	C BL	6	0.133767
GrnYld	distributed	2012 WS	240	ABCD 1553	C BL	7	0.146424
GrnYld	distributed	2012 WS	240	ABCD 1553	C BL	8	0.113448
GrnYld	distributed	2012 WS	240	ABCD 1553	C BL	9	0.137021
GrnYld	distributed	2012 WS	240	ABCD 1553	C BL	10	0.134072
GrnYld	distributed	2012 WS	480	CDE 781	C BL	1	0.155447
GrnYld	distributed	2012 WS	480	CDE 781	C BL	2	0.100086
GrnYld	distributed	2012 WS	480	CDE 781	C BL	3	0.146738
GrnYld	distributed	2012 WS	480	CDE 781	C BL	4	0.107696
GrnYld	distributed	2012 WS	480	CDE 781	C BL	5	0.182387
GrnYld	distributed	2012 WS	480	CDE 781	C BL	6	0.173054
GrnYld	distributed	2012 WS	480	CDE 781	C BL	7	0.181591
GrnYld	distributed	2012 WS	480	CDE 781	C BL	8	0.122296
GrnYld	distributed	2012 WS	480	CDE 781	C BL	9	0.118467
GrnYld	distributed	2012 WS	480	CDE 781	C BL	10	0.106642
GrnYld	distributed	2012 WS	840	A 448	BC BL	1	0.188739
GrnYld	distributed	2012 WS	840	A 448	BC BL	2	0.137873
GrnYld	distributed	2012 WS	840	A 448	BC BL	3	0.14857
GrnYld	distributed	2012 WS	840	A 448	BC BL	4	0.209244
GrnYld	distributed	2012 WS	840	A 448	BC BL	5	0.187685
GrnYld	distributed	2012 WS	840	A 448	BC BL	6	0.233562
GrnYld	distributed	2012 WS	840	A 448	BC BL	7	0.165541
GrnYld	distributed	2012 WS	840	A 448	BC BL	8	0.139614
GrnYld	distributed	2012 WS	840	A 448	BC BL	9	0.15383
GrnYld	distributed	2012 WS	840	A 448	BC BL	10	0.180395
GrnYld	distributed	2012 WS	1200	AB 316	B BL	1	0.183043
GrnYld	distributed	2012 WS	1200	AB 316	B BL	2	0.129158
GrnYld	distributed	2012 WS	1200	AB 316	B BL	3	0.178822
GrnYld	distributed	2012 WS	1200	AB 316	B BL	4	0.186312
GrnYld	distributed	2012 WS	1200	AB 316	B BL	5	0.165623
GrnYld	distributed	2012 WS	1200	AB 316	B BL	6	0.153737
GrnYld	distributed	2012 WS	1200	AB 316	B BL	7	0.144141
GrnYld	distributed	2012 WS	1200	AB 316	B BL	8	0.176167
GrnYld	distributed	2012 WS	1200	AB 316	B BL	9	0.194256
GrnYld	distributed	2012 WS	1200	AB 316	B BL	10	0.177805
GrnYld	distributed	2012 WS	1800	ABCD 212	C BL	1	0.204686
GrnYld	distributed	2012 WS	1800	ABCD 212	C BL	2	0.115067
GrnYld	distributed	2012 WS	1800	ABCD 212	C BL	3	0.151261
GrnYld	distributed	2012 WS	1800	ABCD 212	C BL	4	0.115125
GrnYld	distributed	2012 WS	1800	ABCD 212	C BL	5	0.191525
GrnYld	distributed	2012 WS	1800	ABCD 212	C BL	6	0.201842
GrnYld	distributed	2012 WS	1800	ABCD 212	C BL	7	0.144904
GrnYld	distributed	2012 WS	1800	ABCD 212	C BL	8	0.15215
GrnYld	distributed	2012 WS	1800	ABCD 212	C BL	9	0.129886
GrnYld	distributed	2012 WS	1800	ABCD 212	C BL	10	0.110744
GrnYld	distributed	2012 WS	2400	ABC 161	B BL	1	0.181377
GrnYld	distributed	2012 WS	2400	ABC 161	B BL	2	0.176022
GrnYld	distributed	2012 WS	2400	ABC 161	B BL	3	0.200599
GrnYld	distributed	2012 WS	2400	ABC 161	B BL	4	0.198027
GrnYld	distributed	2012 WS	2400	ABC 161	B BL	5	0.178519
GrnYld	distributed	2012 WS	2400	ABC 161	B BL	6	0.0887745
GrnYld	distributed	2012 WS	2400	ABC 161	B BL	7	0.164741
GrnYld	distributed	2012 WS	2400	ABC 161	B BL	8	0.135466
GrnYld	distributed	2012 WS	2400	ABC 161	B BL	9	0.105834
GrnYld	distributed	2012 WS	2400	ABC 161	B BL	10	0.214349
GrnYld	distributed	2012 WS	3600	CDE 109	C BL	1	0.209907
GrnYld	distributed	2012 WS	3600	CDE 109	C BL	2	0.0955896
GrnYld	distributed	2012 WS	3600	CDE 109	C BL	3	0.105124
GrnYld	distributed	2012 WS	3600	CDE 109	C BL	4	0.183108
GrnYld	distributed	2012 WS	3600	CDE 109	C BL	5	0.155132
GrnYld	distributed	2012 WS	3600	CDE 109	C BL	6	0.145681
GrnYld	distributed	2012 WS	3600	CDE 109	C BL	7	0.151528
GrnYld	distributed	2012 WS	3600	CDE 109	C BL	8	0.134128
GrnYld	distributed	2012 WS	3600	CDE 109	C BL	9	0.0903508
GrnYld	distributed	2012 WS	3600	CDE 109	C BL	10	0.133217
GrnYld	distributed	2012 WS	4800	E 83	B BL	1	0.196896
GrnYld	distributed	2012 WS	4800	E 83	B BL	2	0.138914
GrnYld	distributed	2012 WS	4800	E 83	B BL	3	0.147327
GrnYld	distributed	2012 WS	4800	E 83	B BL	4	0.118592
GrnYld	distributed	2012 WS	4800	E 83	B BL	5	0.115251
GrnYld	distributed	2012 WS	4800	E 83	B BL	6	0.140763
GrnYld	distributed	2012 WS	4800	E 83	B BL	7	0.115744
GrnYld	distributed	2012 WS	4800	E 83	B BL	8	0.103124
GrnYld	distributed	2012 WS	4800	E 83	B BL	9	0.0671712
GrnYld	distributed	2012 WS	4800	E 83	B BL	10	0.0323676
GrnYld	distributed	2012 WS	25	F 13101	D MLR	1	0.0636065
GrnYld	distributed	2012 WS	25	F 13101	D MLR	2	0.0504712
GrnYld	distributed	2012 WS	25	F 13101	D MLR	3	0.0505952
GrnYld	distributed	2012 WS	25	F 13101	D MLR	4	0.0675859
GrnYld	distributed	2012 WS	25	F 13101	D MLR	5	0.0504821
GrnYld	distributed	2012 WS	25	F 13101	D MLR	6	0.0622323
GrnYld	distributed	2012 WS	25	F 13101	D MLR	7	0.0737725
GrnYld	distributed	2012 WS	25	F 13101	D MLR	8	0.0346684
GrnYld	distributed	2012 WS	25	F 13101	D MLR	9	0.0601172
GrnYld	distributed	2012 WS	25	F 13101	D MLR	10	0.0540099
GrnYld	distributed	2012 WS	50	DE 7142	D MLR	1	0.164966
GrnYld	distributed	2012 WS	50	DE 7142	D MLR	2	0.130636
GrnYld	distributed	2012 WS	50	DE 7142	D MLR	3	0.121048
GrnYld	distributed	2012 WS	50	DE 7142	D MLR	4	0.102349
GrnYld	distributed	2012 WS	50	DE 7142	D MLR	5	0.167828
GrnYld	distributed	2012 WS	50	DE 7142	D MLR	6	0.100617
GrnYld	distributed	2012 WS	50	DE 7142	D MLR	7	0.0819137
GrnYld	distributed	2012 WS	50	DE 7142	D MLR	8	0.0168544
GrnYld	distributed	2012 WS	50	DE 7142	D MLR	9	0.0781308
GrnYld	distributed	2012 WS	50	DE 7142	D MLR	10	0.06914
GrnYld	distributed	2012 WS	120	DE 3076	D MLR	1	0.109115
GrnYld	distributed	2012 WS	120	DE 3076	D MLR	2	0.17678
GrnYld	distributed	2012 WS	120	DE 3076	D MLR	3	0.0626043
GrnYld	distributed	2012 WS	120	DE 3076	D MLR	4	0.0963168
GrnYld	distributed	2012 WS	120	DE 3076	D MLR	5	0.0660366
GrnYld	distributed	2012 WS	120	DE 3076	D MLR	6	0.111648
GrnYld	distributed	2012 WS	120	DE 3076	D MLR	7	0.146112
GrnYld	distributed	2012 WS	120	DE 3076	D MLR	8	0.141385
GrnYld	distributed	2012 WS	120	DE 3076	D MLR	9	0.0231248
GrnYld	distributed	2012 WS	120	DE 3076	D MLR	10	0.132899
GrnYld	distributed	2012 WS	240	D 1553	C MLR	1	0.172391
GrnYld	distributed	2012 WS	240	D 1553	C MLR	2	0.0890052
GrnYld	distributed	2012 WS	240	D 1553	C MLR	3	0.0909424
GrnYld	distributed	2012 WS	240	D 1553	C MLR	4	0.188468
GrnYld	distributed	2012 WS	240	D 1553	C MLR	5	0.149058
GrnYld	distributed	2012 WS	240	D 1553	C MLR	6	0.119936
GrnYld	distributed	2012 WS	240	D 1553	C MLR	7	0.179023
GrnYld	distributed	2012 WS	240	D 1553	C MLR	8	0.118178
GrnYld	distributed	2012 WS	240	D 1553	C MLR	9	0.0918366
GrnYld	distributed	2012 WS	240	D 1553	C MLR	10	0.0633663
GrnYld	distributed	2012 WS	480	C 781	AB MLR	1	0.159484
GrnYld	distributed	2012 WS	480	C 781	AB MLR	2	0.0651813
GrnYld	distributed	2012 WS	480	C 781	AB MLR	3	0.254619
GrnYld	distributed	2012 WS	480	C 781	AB MLR	4	0.196206
GrnYld	distributed	2012 WS	480	C 781	AB MLR	5	0.246301
GrnYld	distributed	2012 WS	480	C 781	AB MLR	6	0.135244
GrnYld	distributed	2012 WS	480	C 781	AB MLR	7	0.188921
GrnYld	distributed	2012 WS	480	C 781	AB MLR	8	0.180708
GrnYld	distributed	2012 WS	480	C 781	AB MLR	9	0.175036
GrnYld	distributed	2012 WS	480	C 781	AB MLR	10	0.164398
GrnYld	distributed	2012 WS	840	ABC 448	AB MLR	1	0.234809
GrnYld	distributed	2012 WS	840	ABC 448	AB MLR	2	0.105682
GrnYld	distributed	2012 WS	840	ABC 448	AB MLR	3	0.160691
GrnYld	distributed	2012 WS	840	ABC 448	AB MLR	4	0.276525
GrnYld	distributed	2012 WS	840	ABC 448	AB MLR	5	0.244218
GrnYld	distributed	2012 WS	840	ABC 448	AB MLR	6	0.263585
GrnYld	distributed	2012 WS	840	ABC 448	AB MLR	7	0.145284
GrnYld	distributed	2012 WS	840	ABC 448	AB MLR	8	0.158621
GrnYld	distributed	2012 WS	840	ABC 448	AB MLR	9	0.24937
GrnYld	distributed	2012 WS	840	ABC 448	AB MLR	10	0.225228
GrnYld	distributed	2012 WS	1200	BC 316	A MLR	1	0.187899
GrnYld	distributed	2012 WS	1200	BC 316	A MLR	2	0.126603
GrnYld	distributed	2012 WS	1200	BC 316	A MLR	3	0.274078
GrnYld	distributed	2012 WS	1200	BC 316	A MLR	4	0.182045
GrnYld	distributed	2012 WS	1200	BC 316	A MLR	5	0.199269
GrnYld	distributed	2012 WS	1200	BC 316	A MLR	6	0.25635
GrnYld	distributed	2012 WS	1200	BC 316	A MLR	7	0.155268
GrnYld	distributed	2012 WS	1200	BC 316	A MLR	8	0.226858
GrnYld	distributed	2012 WS	1200	BC 316	A MLR	9	0.22668
GrnYld	distributed	2012 WS	1200	BC 316	A MLR	10	0.142599
GrnYld	distributed	2012 WS	1800	AB 212	A MLR	1	0.230604
GrnYld	distributed	2012 WS	1800	AB 212	A MLR	2	0.193827
GrnYld	distributed	2012 WS	1800	AB 212	A MLR	3	0.305699
GrnYld	distributed	2012 WS	1800	AB 212	A MLR	4	0.221288
GrnYld	distributed	2012 WS	1800	AB 212	A MLR	5	0.245494
GrnYld	distributed	2012 WS	1800	AB 212	A MLR	6	0.259502
GrnYld	distributed	2012 WS	1800	AB 212	A MLR	7	0.276446
GrnYld	distributed	2012 WS	1800	AB 212	A MLR	8	0.19455
GrnYld	distributed	2012 WS	1800	AB 212	A MLR	9	0.279419
GrnYld	distributed	2012 WS	1800	AB 212	A MLR	10	0.206456
GrnYld	distributed	2012 WS	2400	AB 161	A MLR	1	0.22826
GrnYld	distributed	2012 WS	2400	AB 161	A MLR	2	0.218321
GrnYld	distributed	2012 WS	2400	AB 161	A MLR	3	0.287511
GrnYld	distributed	2012 WS	2400	AB 161	A MLR	4	0.326332
GrnYld	distributed	2012 WS	2400	AB 161	A MLR	5	0.185542
GrnYld	distributed	2012 WS	2400	AB 161	A MLR	6	0.157659
GrnYld	distributed	2012 WS	2400	AB 161	A MLR	7	0.187484
GrnYld	distributed	2012 WS	2400	AB 161	A MLR	8	0.13308
GrnYld	distributed	2012 WS	2400	AB 161	A MLR	9	0.261773
GrnYld	distributed	2012 WS	2400	AB 161	A MLR	10	0.273518
GrnYld	distributed	2012 WS	3600	A 109	A MLR	1	0.305121
GrnYld	distributed	2012 WS	3600	A 109	A MLR	2	0.23994
GrnYld	distributed	2012 WS	3600	A 109	A MLR	3	0.264886
GrnYld	distributed	2012 WS	3600	A 109	A MLR	4	0.316574
GrnYld	distributed	2012 WS	3600	A 109	A MLR	5	0.249223
GrnYld	distributed	2012 WS	3600	A 109	A MLR	6	0.239663
GrnYld	distributed	2012 WS	3600	A 109	A MLR	7	0.255994
GrnYld	distributed	2012 WS	3600	A 109	A MLR	8	0.159067
GrnYld	distributed	2012 WS	3600	A 109	A MLR	9	0.175392
GrnYld	distributed	2012 WS	3600	A 109	A MLR	10	0.267232
GrnYld	distributed	2012 WS	4800	BC 83	A MLR	1	0.268844
GrnYld	distributed	2012 WS	4800	BC 83	A MLR	2	0.269096
GrnYld	distributed	2012 WS	4800	BC 83	A MLR	3	0.281566
GrnYld	distributed	2012 WS	4800	BC 83	A MLR	4	0.218694
GrnYld	distributed	2012 WS	4800	BC 83	A MLR	5	0.232816
GrnYld	distributed	2012 WS	4800	BC 83	A MLR	6	0.232559
GrnYld	distributed	2012 WS	4800	BC 83	A MLR	7	0.226758
GrnYld	distributed	2012 WS	4800	BC 83	A MLR	8	0.0762682
GrnYld	distributed	2012 WS	4800	BC 83	A MLR	9	0.0736746
GrnYld	distributed	2012 WS	4800	BC 83	A MLR	10	0.110023
GrnYld	distributed	2012 WS	25	AB 13101	B RF	1	0.261323
GrnYld	distributed	2012 WS	25	AB 13101	B RF	2	0.233271
GrnYld	distributed	2012 WS	25	AB 13101	B RF	3	0.257778
GrnYld	distributed	2012 WS	25	AB 13101	B RF	4	0.254308
GrnYld	distributed	2012 WS	25	AB 13101	B RF	5	0.26168
GrnYld	distributed	2012 WS	25	AB 13101	B RF	6	0.272696
GrnYld	distributed	2012 WS	25	AB 13101	B RF	7	0.252599
GrnYld	distributed	2012 WS	25	AB 13101	B RF	8	0.233507
GrnYld	distributed	2012 WS	25	AB 13101	B RF	9	0.265511
GrnYld	distributed	2012 WS	25	AB 13101	B RF	10	0.273044
GrnYld	distributed	2012 WS	50	BC 7142	B RF	1	0.235105
GrnYld	distributed	2012 WS	50	BC 7142	B RF	2	0.215153
GrnYld	distributed	2012 WS	50	BC 7142	B RF	3	0.210689
GrnYld	distributed	2012 WS	50	BC 7142	B RF	4	0.224499
GrnYld	distributed	2012 WS	50	BC 7142	B RF	5	0.243082
GrnYld	distributed	2012 WS	50	BC 7142	B RF	6	0.231751
GrnYld	distributed	2012 WS	50	BC 7142	B RF	7	0.226715
GrnYld	distributed	2012 WS	50	BC 7142	B RF	8	0.232267
GrnYld	distributed	2012 WS	50	BC 7142	B RF	9	0.265612
GrnYld	distributed	2012 WS	50	BC 7142	B RF	10	0.252462
GrnYld	distributed	2012 WS	120	C 3076	B RF	1	0.164298
GrnYld	distributed	2012 WS	120	C 3076	B RF	2	0.1914
GrnYld	distributed	2012 WS	120	C 3076	B RF	3	0.216319
GrnYld	distributed	2012 WS	120	C 3076	B RF	4	0.228576
GrnYld	distributed	2012 WS	120	C 3076	B RF	5	0.175931
GrnYld	distributed	2012 WS	120	C 3076	B RF	6	0.25336
GrnYld	distributed	2012 WS	120	C 3076	B RF	7	0.238573
GrnYld	distributed	2012 WS	120	C 3076	B RF	8	0.249893
GrnYld	distributed	2012 WS	120	C 3076	B RF	9	0.210927
GrnYld	distributed	2012 WS	120	C 3076	B RF	10	0.242481
GrnYld	distributed	2012 WS	240	DE 1553	B RF	1	0.159634
GrnYld	distributed	2012 WS	240	DE 1553	B RF	2	0.163786
GrnYld	distributed	2012 WS	240	DE 1553	B RF	3	0.166335
GrnYld	distributed	2012 WS	240	DE 1553	B RF	4	0.189855
GrnYld	distributed	2012 WS	240	DE 1553	B RF	5	0.199301
GrnYld	distributed	2012 WS	240	DE 1553	B RF	6	0.20659
GrnYld	distributed	2012 WS	240	DE 1553	B RF	7	0.186779
GrnYld	distributed	2012 WS	240	DE 1553	B RF	8	0.193216
GrnYld	distributed	2012 WS	240	DE 1553	B RF	9	0.162521
GrnYld	distributed	2012 WS	240	DE 1553	B RF	10	0.213921
GrnYld	distributed	2012 WS	480	F 781	BC RF	1	0.140846
GrnYld	distributed	2012 WS	480	F 781	BC RF	2	0.119586
GrnYld	distributed	2012 WS	480	F 781	BC RF	3	0.149603
GrnYld	distributed	2012 WS	480	F 781	BC RF	4	0.130741
GrnYld	distributed	2012 WS	480	F 781	BC RF	5	0.162129
GrnYld	distributed	2012 WS	480	F 781	BC RF	6	0.191707
GrnYld	distributed	2012 WS	480	F 781	BC RF	7	0.192
GrnYld	distributed	2012 WS	480	F 781	BC RF	8	0.14084
GrnYld	distributed	2012 WS	480	F 781	BC RF	9	0.142191
GrnYld	distributed	2012 WS	480	F 781	BC RF	10	0.128221
GrnYld	distributed	2012 WS	840	F 448	BC RF	1	0.152054
GrnYld	distributed	2012 WS	840	F 448	BC RF	2	0.109531
GrnYld	distributed	2012 WS	840	F 448	BC RF	3	0.143395
GrnYld	distributed	2012 WS	840	F 448	BC RF	4	0.174077
GrnYld	distributed	2012 WS	840	F 448	BC RF	5	0.146109
GrnYld	distributed	2012 WS	840	F 448	BC RF	6	0.206555
GrnYld	distributed	2012 WS	840	F 448	BC RF	7	0.190263
GrnYld	distributed	2012 WS	840	F 448	BC RF	8	0.133387
GrnYld	distributed	2012 WS	840	F 448	BC RF	9	0.115762
GrnYld	distributed	2012 WS	840	F 448	BC RF	10	0.167467
GrnYld	distributed	2012 WS	1200	DEF 316	B RF	1	0.133078
GrnYld	distributed	2012 WS	1200	DEF 316	B RF	2	0.133326
GrnYld	distributed	2012 WS	1200	DEF 316	B RF	3	0.139276
GrnYld	distributed	2012 WS	1200	DEF 316	B RF	4	0.15302
GrnYld	distributed	2012 WS	1200	DEF 316	B RF	5	0.158738
GrnYld	distributed	2012 WS	1200	DEF 316	B RF	6	0.242632
GrnYld	distributed	2012 WS	1200	DEF 316	B RF	7	0.200689
GrnYld	distributed	2012 WS	1200	DEF 316	B RF	8	0.189846
GrnYld	distributed	2012 WS	1200	DEF 316	B RF	9	0.155154
GrnYld	distributed	2012 WS	1200	DEF 316	B RF	10	0.14991
GrnYld	distributed	2012 WS	1800	EF 212	C RF	1	0.21015
GrnYld	distributed	2012 WS	1800	EF 212	C RF	2	0.146532
GrnYld	distributed	2012 WS	1800	EF 212	C RF	3	0.166139
GrnYld	distributed	2012 WS	1800	EF 212	C RF	4	0.128912
GrnYld	distributed	2012 WS	1800	EF 212	C RF	5	0.204025
GrnYld	distributed	2012 WS	1800	EF 212	C RF	6	0.180787
GrnYld	distributed	2012 WS	1800	EF 212	C RF	7	0.127533
GrnYld	distributed	2012 WS	1800	EF 212	C RF	8	0.186656
GrnYld	distributed	2012 WS	1800	EF 212	C RF	9	0.152162
GrnYld	distributed	2012 WS	1800	EF 212	C RF	10	0.0916887
GrnYld	distributed	2012 WS	2400	D 161	AB RF	1	0.210671
GrnYld	distributed	2012 WS	2400	D 161	AB RF	2	0.203961
GrnYld	distributed	2012 WS	2400	D 161	AB RF	3	0.200621
GrnYld	distributed	2012 WS	2400	D 161	AB RF	4	0.206379
GrnYld	distributed	2012 WS	2400	D 161	AB RF	5	0.14872
GrnYld	distributed	2012 WS	2400	D 161	AB RF	6	0.151963
GrnYld	distributed	2012 WS	2400	D 161	AB RF	7	0.172297
GrnYld	distributed	2012 WS	2400	D 161	AB RF	8	0.168857
GrnYld	distributed	2012 WS	2400	D 161	AB RF	9	0.187108
GrnYld	distributed	2012 WS	2400	D 161	AB RF	10	0.234565
GrnYld	distributed	2012 WS	3600	DEF 109	BC RF	1	0.200542
GrnYld	distributed	2012 WS	3600	DEF 109	BC RF	2	0.162336
GrnYld	distributed	2012 WS	3600	DEF 109	BC RF	3	0.135329
GrnYld	distributed	2012 WS	3600	DEF 109	BC RF	4	0.209941
GrnYld	distributed	2012 WS	3600	DEF 109	BC RF	5	0.171352
GrnYld	distributed	2012 WS	3600	DEF 109	BC RF	6	0.176854
GrnYld	distributed	2012 WS	3600	DEF 109	BC RF	7	0.17654
GrnYld	distributed	2012 WS	3600	DEF 109	BC RF	8	0.175388
GrnYld	distributed	2012 WS	3600	DEF 109	BC RF	9	0.169468
GrnYld	distributed	2012 WS	3600	DEF 109	BC RF	10	0.124902
GrnYld	distributed	2012 WS	4800	EF 83	AB RF	1	0.225024
GrnYld	distributed	2012 WS	4800	EF 83	AB RF	2	0.204054
GrnYld	distributed	2012 WS	4800	EF 83	AB RF	3	0.181736
GrnYld	distributed	2012 WS	4800	EF 83	AB RF	4	0.194179
GrnYld	distributed	2012 WS	4800	EF 83	AB RF	5	0.147236
GrnYld	distributed	2012 WS	4800	EF 83	AB RF	6	0.142413
GrnYld	distributed	2012 WS	4800	EF 83	AB RF	7	0.170088
GrnYld	distributed	2012 WS	4800	EF 83	AB RF	8	0.158408
GrnYld	distributed	2012 WS	4800	EF 83	AB RF	9	0.122494
GrnYld	distributed	2012 WS	4800	EF 83	AB RF	10	0.0674478
GrnYld	distributed	2012 WS	25	A 13101	B RKHS	1	0.23824
GrnYld	distributed	2012 WS	25	A 13101	B RKHS	2	0.246258
GrnYld	distributed	2012 WS	25	A 13101	B RKHS	3	0.239945
GrnYld	distributed	2012 WS	25	A 13101	B RKHS	4	0.245516
GrnYld	distributed	2012 WS	25	A 13101	B RKHS	5	0.247118
GrnYld	distributed	2012 WS	25	A 13101	B RKHS	6	0.25759
GrnYld	distributed	2012 WS	25	A 13101	B RKHS	7	0.25322
GrnYld	distributed	2012 WS	25	A 13101	B RKHS	8	0.253529
GrnYld	distributed	2012 WS	25	A 13101	B RKHS	9	0.249213
GrnYld	distributed	2012 WS	25	A 13101	B RKHS	10	0.257296
GrnYld	distributed	2012 WS	50	A 7142	B RKHS	1	0.22937
GrnYld	distributed	2012 WS	50	A 7142	B RKHS	2	0.238625
GrnYld	distributed	2012 WS	50	A 7142	B RKHS	3	0.248519
GrnYld	distributed	2012 WS	50	A 7142	B RKHS	4	0.230136
GrnYld	distributed	2012 WS	50	A 7142	B RKHS	5	0.250666
GrnYld	distributed	2012 WS	50	A 7142	B RKHS	6	0.247354
GrnYld	distributed	2012 WS	50	A 7142	B RKHS	7	0.255273
GrnYld	distributed	2012 WS	50	A 7142	B RKHS	8	0.233423
GrnYld	distributed	2012 WS	50	A 7142	B RKHS	9	0.232034
[truncated: 1,301 more rows]
